# 1 **Pharmacological inhibition of HDAC6 downregulates TGF-** 2 **$\beta$ via Smad2/3 acetylation and improves dystrophin-** 3 **deficient muscles.**

4 Alexis Osseni<sup>1,2</sup>, Aymeric Ravel-Chapuis<sup>3,4</sup>, Isabella Scionti<sup>1</sup>, Yann-Gaël Gangloff<sup>1</sup>, Vincent  
5 Moncollin<sup>1</sup>, Remi Mounier<sup>1</sup>, Pascal Leblanc<sup>1</sup>, Bernard J. Jasmin<sup>3,4</sup># and Laurent Schaeffer<sup>1,2</sup>#.

6 Affiliations: <sup>1</sup> Institut NeuroMyoGene (INMG-PGNM), CNRS UMR 5261, INSERM U  
7 1315, Université de Lyon, Lyon, France; <sup>2</sup> Centre de Biotechnologie Cellulaire,  
8 Hospices Civils de Lyon, Lyon, France; <sup>3</sup> Department of Cellular and Molecular  
9 Medicine, Faculty of Medicine, 451 Smyth Road, University of Ottawa, Ottawa,  
10 Ontario, Canada, K1H 8M5; <sup>4</sup> Éric Poulin Centre for Neuromuscular Disease,  
11 Faculty of Medicine, University of Ottawa, Ottawa, Ontario, Canada, K1H 8M5

12

## 13 **Abstract / Summary**

14 The absence of dystrophin in Duchenne muscular dystrophy (DMD) disrupts the dystrophin  
15 dystroglycan glycoprotein complex (DGC) resulting in fibers fragility and atrophy, associated  
16 with fibrosis and microtubules and neuromuscular junction (NMJ) disorganization. The specific  
17 non-conventional cytoplasmic histone deacetylase 6 (HDAC6) was previously shown to  
18 regulate acetylcholine receptor distribution and muscle atrophy. Here we show that  
19 administration of the HDAC6 specific inhibitor tubastatin A to the DMD mouse model *mdx*  
20 improves muscle strength, restores microtubules, NMJ and DGC organization, and reduces  
21 muscle atrophy and fibrosis. These effects involve the known action of HDAC6 on  
22 microtubules acetylation and muscle atrophy but also involve a yet undiscovered action of  
23 HDAC6 on transforming growth factor beta (TGF- $\beta$ ) signaling. Conversely, to inhibitors of  
24 nuclear HDACs that regulate TGF- $\beta$  signaling *via* the activation of Follistatin expression,  
25 HDAC6 inhibition acts downstream of TGF- $\beta$  ligands and receptors by increasing Smad2/3  
26 acetylation in the cytoplasm which in turn inhibits its phosphorylation and transcriptional  
27 activity.

28

29 **Running title:** Smad2/3 acetylation *via* HDAC6 improves *mdx* muscles.

30 **Authorship note:** # B.J. Jasmin and L. Schaeffer share senior authorship.

31 Duchenne muscular dystrophy (DMD) is an X-linked neuromuscular recessive disorder  
32 affecting around 1 in 3.500 newborn males worldwide and is the most common and fatal form  
33 of muscular dystrophy<sup>1,2</sup>. Patients with DMD manifest their first clinical symptoms at the age  
34 of 3-4 years and become wheelchair dependent between the ages of 7 and 13 years. The  
35 ambulation period can be prolonged in many boys with DMD with early initiation of steroid  
36 treatment. The terminal stage of the disease starts when patients require assisted ventilation by  
37 the age of around 20 and patients usually die in their third or fourth decade due to respiratory  
38 or cardiac failure<sup>3-7</sup>. DMD results from mutations in the dystrophin gene that cause the  
39 synthesis of nonfunctional or the absence of dystrophin protein. Dystrophin is a critical  
40 component of the dystrophin-associated glycoprotein complex (DGC) in muscle<sup>8</sup>. DGC is a  
41 structure that spans the sarcolemma and forms a mechanical link between the cytoskeleton and  
42 the extracellular matrix *via* the association of dystrophin with both actin and microtubule  
43 cytoskeleton and the binding of dystroglycan to laminin in the basal lamina, respectively<sup>9,10</sup>.  
44 During muscle contraction, the DGC acts as a molecular shock absorber and stabilizes the  
45 plasma membrane<sup>11,12</sup>. Loss of dystrophin is associated with muscle deterioration and  
46 degeneration and prevents the DGC to exert its functions, thus rendering muscle fibers more  
47 susceptible to contraction-induced membrane damage leading to cell death<sup>13-16</sup>. This pathologic  
48 process is accompanied by inflammation and fibrosis that participates to muscle wasting and  
49 loss of function<sup>17-21</sup>.

50 Despite tremendous research efforts, no cure is available for DMD patients yet. Gene-based  
51 therapeutic strategies, such as exon skipping, suppression of stop codons, Adeno-associated  
52 virus (AAV)-mediated mini-dystrophin delivery, or CRISPR/Cas9 gene editing are actively  
53 being investigated to treat DMD<sup>22,23</sup>. In parallel, pharmacological treatments are also being  
54 developed<sup>24-27</sup>. Such approaches act on specific signaling pathways and cellular events  
55 including those that can cause upregulation of utrophin A<sup>28-30</sup>. Nonetheless, glucocorticoids  
56 still serve as the gold standard therapy, acting mostly as anti-inflammatory drugs<sup>31</sup>. With the  
57 use of steroids and multidisciplinary care, particularly mechanical ventilation, lifespan  
58 expectancy of DMD patients has been considerably increased and affected individuals can now  
59 reach 30 to 40 years of age.

60 Pan-deacetylase inhibitors were previously shown to significantly improve function and  
61 morphology in dystrophin-deficient mice<sup>32,33</sup>. Indeed, deacetylase inhibitors conferred  
62 dystrophic muscles resistance to contraction-coupled degeneration and alleviated both  
63 morphological and functional consequences of the primary genetic defect. The mechanism

64 involved was shown to be the activation of the expression of the activin binding protein  
65 follistatin that sequesters many ligands of transforming growth factor beta (TGF- $\beta$ ) receptors,  
66 thereby inhibiting this TGF- $\beta$  pathway. TGF- $\beta$  signaling plays a central role in promoting  
67 muscle atrophy and fibrosis in neuromuscular disorders. A variety of ligands including  
68 GDF8/myostatin, GDF11 and Activins bind to type II TGF- $\beta$  receptors that trigger the  
69 phosphorylation of Smad2 and Smad3 transcription factors upon activation. Smad2/3  
70 phosphorylation enables oligomerization with Smad4 and translocation in the nucleus to  
71 activate the expression of genes involved in muscle atrophy in cooperation with FoxO  
72 transcription factors<sup>34-36</sup>.

73 As compared to other nuclear Histone Deacetylases (HDACs) known, HDAC6 is described as  
74 a unique cytoplasmic member of the HDAC family, belonging more specifically to class Iib<sup>37,38</sup>.  
75 HDAC6 deacetylates many cytoplasmic substrates such as tubulin, cortactin and HSP90  
76 whereas other HDACs are typically central regulators of gene expression. Indeed, classical  
77 HDACs such as HDAC4 and HDAC5, are involved in the regulation of atrogenes *via* Myogenin  
78 and Foxo3 transcription factors<sup>39,40</sup>. In this context, we have previously shown that HDAC6 is  
79 an atroгене activated by FoxO3a that can interact with the ubiquitin ligase atrogen1/MAFbx<sup>41</sup>.  
80 Considerable efforts to develop specific HDAC6 inhibitors have been made to treat a variety of  
81 diseases. In particular, several anti-cancer treatments targeting HDAC6 have been  
82 proposed<sup>42,43</sup>. Furthermore, HDAC6 inhibition has been shown to be beneficial for some  
83 neurodegenerative diseases, including Amyotrophic lateral sclerosis or Charcot-Marie-Tooth  
84 disease<sup>44,45</sup>. The HDAC inhibitor, tubastatin A (TubA) stands out as a highly specific HDAC6  
85 inhibitor. Indeed, TubA efficiently and specifically inhibits HDAC6 deacetylase activity with  
86 an IC50 of 15 nM and a strict selectivity for HDAC6 over all other HDACs (over 1000-fold),  
87 except for HDAC8 (57-fold)<sup>45-47</sup>. TubA is known to inhibit TGF- $\beta$ -induced type-1 collagen  
88 expression in lung fibroblasts<sup>48,49</sup> and previous reports have shown that TGF- $\beta$  increases the  
89 activity of HDAC6<sup>48,50</sup>. Indeed, Smad7 regulates expression of HDAC6 in prostate cancer in  
90 response to TGF- $\beta$ <sup>51</sup> and HDAC6 may play an indispensable role in balancing the maintenance  
91 and activation of primordial follicles through mechanistic target of rapamycin (mTOR)  
92 signaling in mice<sup>52,53</sup>.

93 Previous works with pan-HDAC inhibitors have shown that HDAC inhibition improves the  
94 dystrophic phenotype<sup>27,33</sup>. However, it remains unclear which HDAC is involved in this  
95 beneficial effect. In a recent study, we discovered that HDAC6 regulates microtubule stability  
96 and acetylcholine receptors (AChR) clustering in muscle fibers<sup>54</sup>. We thus wondered whether

97 HDAC6 could play a role in the patho-mechanism of DMD and be used as a novel therapeutic  
98 target for the disease. To test this, we investigated the effect of TubA, a highly specific inhibitor  
99 of HDAC6, in DMD mouse model *mdx* and C2C12 cells. Altogether, our results show that the  
100 pharmacological inhibition of HDAC6 deacetylase activity with TubA is beneficial to muscle  
101 from *mdx* mice, both at the functional and morphological levels. Investigation of the mode of  
102 action of TubA revealed that HDAC6 inhibition down-regulates TGF- $\beta$  signaling through an  
103 increase of Smad2/3 acetylation in skeletal muscle.

## 104 **Results**

105 To evaluate the effect of the inhibition of HDAC6 deacetylase activity in dystrophic-deficient  
106 mice, 7-week-old *mdx* mice received daily intraperitoneal injections of TubA (*mdx*-TubA) or  
107 vehicle (*mdx*-veh) at a dose of 25 mg/kg/day as previously described<sup>45,55</sup>. The mice were treated  
108 for 30 days to allow comparison with the previous pre-clinical studies using this duration of  
109 treatment in *mdx* mice<sup>56-58</sup>. Untreated wild-type mice (WT-CTL) mice were used as baseline  
110 controls (Fig. 1a). The efficiency of the treatment with TubA was first evaluated by measuring  
111 the increase in tubulin acetylation (Fig. 1b). As shown in Fig. 1c and 1d, TubA treatment for  
112 30 consecutive days caused as expected, a large increase in  $\alpha$ -tubulin acetylation in TA muscle  
113 from *mdx* mice. In line with published data<sup>54,55</sup>, quantification of the relative level of acetylated  
114 tubulin showed a  $36.5\% \pm 7.8\%$  increase following treatments with the specific HDAC6  
115 inhibitor ( $P < 0.001$  compared with *mdx*-veh mice). To confirm that HDAC6 inhibition did not  
116 affect histone acetylation, histone H3 acetylation on lysine 9 (ac-H3K9) and total histone H3  
117 levels in TA muscles were evaluated by Western blot. Consistent with ongoing muscle damage  
118 in *mdx* mice, H3K9 acetylation was increased in TA muscles from *mdx* mice compared to WT-  
119 CTL animals ( $+43.8\% \pm 14.6\%$ ; extended data Fig. 1a, b). As expected, TubA did not increase  
120 H3K9 acetylation in *mdx* mice ( $P > 0.05$ ). Together, these data indicate that intraperitoneal  
121 injection of TubA efficiently and specifically inhibits HDAC6 deacetylase activity in muscle.

122 Next, we evaluated the effect of the TubA treatment on muscle strength in *mdx* mice. Seven-  
123 week-old untreated *mdx* mice exhibited significantly lower grip strength for all paws ( $P < 0.01$ )  
124 compared with WT-CTL mice. After 30 days of treatment with TubA, the grip strength of *mdx*  
125 mice was significantly increased by 1.5-fold ( $P < 0.05$  compared with *mdx*-veh mice; Fig. 1e),  
126 with a substantial force gain over 30 day ( $P < 0.05$ ; Fig. 1f). TubA treatment almost completely  
127 restored muscle strength of *mdx* mice to WT levels ( $P = 0.5476$  compared with WT-CTL mice;  
128 Fig. 1e). Interestingly, the maximal force was also increased by  $35\% \pm 9.0\%$  in TubA-treated

129 *mdx* mice compared to *mdx*-veh animal although it did not reach the significance level due to  
130 interindividual variability ( $P = 0.062$ ; Fig. 1g). Altogether, these data indicate that inhibition of  
131 HDAC6 deacetylase activity in *mdx* mice restores muscle strength to WT levels.

132 Because of its functional and structural similarity with dystrophin, Utrophin A can compensate  
133 for the lack of dystrophin in DMD<sup>24,29,59,60</sup>. In adult and healthy muscle, Utrophin A is  
134 exclusively localized at synapses<sup>61,62</sup> and it was shown that Utrophin A expression all along  
135 muscle fibers can efficiently compensate for the lack of dystrophin<sup>24,29,63–65</sup>. *Mdx* mice present  
136 an overall milder phenotype than DMD patients<sup>66</sup>. This is partially explained by the  
137 compensatory up-regulation of sarcolemmal Utrophin A expression<sup>24,25,29,59,60,67,68</sup>. All groups  
138 of animals described in figure 1a were thus analyzed by Western blot and immunofluorescence  
139 to evaluate the levels of Utrophin A. As expected, Utrophin A levels were increased at the  
140 sarcolemma ( $P < 0.05$ , Fig. 1h) in *mdx* mice compared with WT-CTL mice. TubA-treatment  
141 further increased Utrophin A levels by ~2-fold compared with *mdx*-veh mice ( $P < 0.05$ ; Fig.  
142 1i). Immunofluorescence experiments further established that TubA treatment indeed caused  
143 an increase in sarcolemmal Utrophin A levels in *mdx* mouse muscles, thereby possibly  
144 conferring a higher protective effect on muscle fiber integrity (Fig. 1j). Additionally, we  
145 assessed both the amount and localization of  $\beta$ -dystroglycan ( $\beta$ -DG), a member of the DGC, in  
146 order to determine whether TubA treatment caused reassembly of the DGC along the  
147 sarcolemma. As expected, in the absence of dystrophin,  $\beta$ -DG accumulation at the plasma  
148 membrane is strongly decreased (Fig. 1k, m). Western blot quantification revealed that TubA  
149 increased the amount of  $\beta$ -DG in *mdx* mice by  $43.2\% \pm 7.0\%$  ( $P < 0.05$ ; Fig. 1l).  
150 Immunofluorescence experiments with TubA (Fig. 1m) indicated that in addition to the increase  
151 in Utrophin A levels,  $\beta$ -DG accumulation at the plasma membrane was increased, suggesting  
152 that TubA treatment restored the DGC complex.

153 To determine whether the effects of TubA on DGC expression was also observed in cultured  
154 muscle cells, C2C12 myotubes were treated for 24 hours with  $5\mu\text{M}$  of one of two specific  
155 inhibitors of HDAC6 deacetylase activity: TubA and tubacin<sup>69</sup> (TBC; Fig. 1n). After the  
156 treatment, Utrophin A expression was evaluated on whole cell extracts by Western blot (Fig.  
157 1o). Both HDAC6 inhibitors induced a significant upregulation of Utrophin A levels ~1.75-  
158 fold ( $P < 0.05$ ) in C2C12 muscle cells compared to vehicle-treated cells (Fig. 1p). Together,  
159 these data demonstrate that treatments with HDAC6 inhibitors increase Utrophin A levels in  
160 C2C12 myotubes in agreement with the data obtained with the DMD mouse model *mdx*.

161 To determine whether TubA treatment provided additional benefits to *mdx* muscle fibers,  
162 muscle atrophy was evaluated. Histopathological studies have shown that abnormal fiber size  
163 distribution, with a strong increase in very small fibers, is a hallmark of dystrophic muscles<sup>70</sup>.  
164 Fiber size distribution was assessed by measuring the cross-sectional area (CSA) of individual  
165 fibers in the slow oxidative *soleus* muscle (SOL) and the fast glycolytic *extensor digitorum*  
166 *longus muscle* (EDL), from *mdx* mice treated with TubA or vehicle and control mice. As  
167 expected, the CSA profiles of vehicle-treated *mdx* muscles displayed substantial heterogeneity  
168 and many small fibers when compared to healthy muscles (Fig. 2a, d). In all muscles analyzed,  
169 TubA restored the fiber size distribution comparable to that in WT muscles by significantly  
170 decreasing the proportion of small muscle fibers (Fig. 2b, e). In TubA-treated *mdx* mice, these  
171 muscle adaptations were accompanied by a significant decrease of the average variance  
172 coefficient. Indeed, TubA treatment reduced by ~ 25% ( $P < 0.01$ , compared with *mdx*-veh mice)  
173 the variance coefficient of fibers CSA in *mdx* EDL and SOL muscles (Fig. 2c, f). In summary,  
174 four weeks of TubA treatment normalized fiber size distribution in both EDL and SOL *mdx*  
175 muscles indicating a protective effect of TubA against muscle atrophy.

176 We previously showed that HDAC6 contributes to muscle atrophy<sup>41</sup>. Given the overall increase  
177 in fiber size observed in *mdx* muscles upon TubA treatment, we investigated the mechanism by  
178 which pharmacological inhibition of HDAC6 decreased muscle atrophy in *mdx* mice (Fig. 2g,  
179 i). The expression of protein markers involved in muscle atrophy was evaluated by Western  
180 blot. TubA caused a  $57\% \pm 11\%$  reduction of MAFbx/atrogen1 ( $P < 0.05$ ; Fig. 2h) and a  $35\% \pm$   
181  $4\%$  reduction of the E3 ubiquitin-protein ligase TRIM63/MuRF1 ( $P < 0.05$ ; Fig. 2j) compared  
182 with *mdx*-veh animals. Together, these data indicate that HDAC6 inhibition reduces expression  
183 of key mediators of muscle atrophy, thus providing an explanation for the normalization of the  
184 size of muscle fibers.

185 In addition, heterogeneity in *mdx* fiber size results mainly from the presence of small  
186 regenerating fibers subsequent to the loss of necrotic fibers. Central nucleation is as a key  
187 indicator of muscle damage in dystrophic muscle fibers<sup>70,71</sup>. To evaluate the effect of TubA on  
188 the extent of muscle damage, the number of fibers with central nuclei was evaluated using  
189 hematoxylin eosin staining (Fig. 2k). TubA caused a significant decrease in the number of  
190 centronucleated fibers ( $- 15\% \pm 2\%$  in EDL muscle, Fig. 2l and  $- 24\% \pm 2\%$  in SOL muscle,  
191 Fig. 2m; both  $P < 0.05$ , compared with *mdx*-veh mice). Furthermore, the loss of muscle fibers  
192 is accompanied by the progressive accumulation of fibrotic tissue<sup>72</sup>. We therefore investigated  
193 by Western blot if the expression of fibrosis-associated proteins in *mdx* muscles was reduced



194 by TubA (Fig. 2m, p). The protein levels type I Collagen Alpha 1 Chain (CollA1) and  
195 connective tissue growth factor (CTGF) were reduced in *mdx* mice treated with TubA compared  
196 to vehicle treated *mdx* mice ( $-36\% \pm 7\%$ , Fig. 2o and  $-16\% \pm 1\%$ , Fig. 2q; respectively,  $P <$   
197  $0.05$ ). Together, these data show that HDAC6 inhibition in dystrophic muscle reduces central  
198 nucleation, normalizes fiber size distribution, reduces the proportion of small fibers, and  
199 diminishes fibrosis.

200 Dystrophin and Utrophin A link the DGC complex to the microtubule network<sup>10,73</sup>. In  
201 agreement with previous data<sup>10,74</sup>, we confirmed by Western blotting and immunofluorescence  
202 staining that *mdx* mice have more tubulin and a greater microtubule density, respectively, in  
203 TA and EDL fibers *mdx* mice than WT-CTL mice ( $P < 0.05$ , Fig. 1d and extended data Fig. 2a,  
204 b). However, TubA treatment did not affect overall  $\alpha$ -tubulin abundance ( $P > 0.05$  compared  
205 with *mdx*-veh mice; Fig. 1d). In healthy muscle, the microtubule network forms a grid lattice  
206 with longitudinal, transverse, and perinuclear microtubules<sup>75-77</sup>. In healthy skeletal muscle,  
207 transverse and longitudinal microtubules are regularly spaced by  $\sim 2 \mu\text{m}$  and  $\sim 5 \mu\text{m}$ ,  
208 respectively (see arrowheads Fig. 3a and extended data Fig. 2c-e). In *mdx* muscles,  
209 immunofluorescence experiments show a disorganization of the microtubule network, with a  
210 loss of the grid-like organization (see arrows Fig. 3a). Interestingly, in *mdx* mice treated with  
211 TubA the microtubule lattice was restored (see the spacing between microtubules on the blue  
212 and yellow line scans and extended data Fig. 2c-e). We further analyzed the microtubule  
213 network with a software specifically developed to analyze microtubule directionality<sup>78</sup> (TeDT  
214 program; Fig. 3b). TeDT program analysis revealed a significant decrease of transversely  
215 oriented microtubules (centered around  $90^\circ$ ) in vehicle-treated *mdx* muscles compared to WT  
216 and to TubA-treated *mdx* mice ( $P < 0.05$  compared with *mdx*-veh mice). These data show that  
217 TubA treatment restores the organization of the microtubule network in *mdx* muscles. In  
218 agreement with previous work<sup>54,79</sup>, this further demonstrate that microtubule acetylation *via*  
219 HDAC6 inhibition stabilizes and restores transverse microtubules.

220 Describe to ameliorate the microtubule organization, HDAC6 also regulates AChR clustering  
221 at the NMJ<sup>54</sup>. The severe fragmentation of NMJs observed in *mdx* muscles strongly suggests  
222 that dystrophin participates to the maintenance of the NMJ<sup>80</sup>. We therefore analyzed NMJ  
223 organization in control and treated *mdx* mice (Fig. 3c).  $\alpha$ -bungarotoxin staining used to  
224 visualize the acetylcholine receptor indicates that NMJ organization was severely compromised  
225 in control *mdx*-veh treated mice as compared to control WT NMJs (Fig. 3c, d), as expected  
226 from previous works<sup>81-83</sup>. Based on a fragmentation index and the number of clusters per NMJ

227 and the endplate diameter, AChRs in *mdx* mice are more discontinuous and punctate than those  
228 in WT mice. The compactness of *mdx*-veh NMJs was decreased by  $26\% \pm 11\%$  ( $P < 0.05$ ; Fig.  
229 3e) and the fragmentation index was increased by approximately 2-fold ( $P < 0.001$ ; Fig. 3f, g).  
230 Interestingly, TubA-treated *mdx* NMJs compared to vehicle-treated *mdx* NMJs showed a  
231 normalization of endplate diameter ( $- 24\% \pm 13\%$ ,  $P < 0.05$ ; Fig. 3d) and of endplate  
232 compactness ( $+ 31.3\% \pm 12.5\%$ ,  $P < 0.05$ ; Fig. 3e). The number of fragments composing the  
233 NMJ was also increased ( $+ 63\% \pm 1\%$  of NMJs composed of 1 to 3 fragments,  $P < 0.05$ ; Fig.  
234 3f) and the fragmentation index was decreased by  $13.2\% \pm 2\%$  ( $P < 0.05$ ; Fig. 3g). Altogether,  
235 TubA-treatment partially rescued AChR distribution in *mdx* mice thanks to an increase of  
236 compactness and recruitment of AChR patches.

237 Furthermore, dystrophin transcription is also controlled via mTOR pathway<sup>84</sup>. Indeed, mTOR  
238 deficiency leads to reduced muscle dystrophin content and causes dystrophic defects leading to  
239 severe myopathy. In this context, we investigated if HDAC6 inhibition in *mdx* muscle could  
240 promote protein synthesis by measuring the phosphorylation of various components of the  
241 mTOR pathway (Fig. 4a). mTOR protein level was not significantly changes ( $P = 0.342$ ; Fig.  
242 4b, c) whereas a  $\sim 2$ -fold increase of p70-S6 kinase phosphorylation at threonine 389 was  
243 observed ( $P < 0.05$ ; Fig. 4d, e). Consistent with increased p70-S6 kinase activity, we observed  
244 a  $\sim 2$ -fold increase of the phosphorylation of S6 on both Ser235-236 and Ser240-244 ( $P < 0.05$ ;  
245 Fig. 4f, g, h). Finally, TubA induced a significant increase in the phosphorylation of the  
246 translation inhibitor 4EBP1 on the mTOR-sensitive sites as shown by the increase in the ratio  
247 of 4E-BP1  $\gamma$  over 4E-BP1  $\beta$  isoforms for phospho-Thr36-45, phospho-Thr70 as well as for  
248 total 4E-BP1 (Fig. 4i, j, k, l). Altogether, our data show that a 30 day-treatment with TubA  
249 stimulates muscle protein synthesis in *mdx* mice *via* the mTOR pathway.

250 Recently data reported that mTOR activation is led by the TGF- $\beta$  signaling<sup>85</sup> of which family  
251 members are major regulators of muscle mass. The effects of TubA thus prompted us to explore  
252 TGF- $\beta$  signaling. Indeed, muscle atrophy induced by the TGF- $\beta$  member myostatin involves  
253 Smad2/3 signaling that activates MAFbx expression and downregulates mTOR signaling<sup>86,87</sup>.  
254 Smad2/3 proteins require phosphorylation to enter inside nucleus and activate its target genes<sup>88</sup>.  
255 Interestingly, Smad2/3 proteins have also been shown to be acetylated in the nucleus<sup>89,90</sup>.  
256 Mouse C2C12 myoblasts were treated for 24 hours with either vehicle (DMSO), TubA or  
257 SB431542 (SB43) a specific inhibitor of the TGF- $\beta$ /Activin/NODAL pathway<sup>91</sup>. After removal  
258 of the inhibitors, C2C12 myoblasts were exposed for 30 min to recombinant human TGF- $\beta$ 1<sup>92</sup>



259 (rhTGF- $\beta$ 1) and the subcellular localization of Smad2/3 was analyzed by immunofluorescence  
260 using anti-acetylated tubulin and anti-Smad2/3 antibodies.

261 TubA treatment similarly increased tubulin acetylation both in the presence and absence of  
262 rhTGF- $\beta$ 1, indicating that TGF- $\beta$  signaling does not affect HDAC6 deacetylase activity (Fig.  
263 5a and extended data Fig. 3a,c). In agreement with previous data<sup>93,94</sup>, rhTGF- $\beta$ 1 treatment  
264 increased Smad2/3 phosphorylation at serines 465-467 and 423-425, respectively (extended  
265 data Fig. 3b). Consistently, immunofluorescence and Western blot experiments in C2C12 cell  
266 line respectively indicated that rhTGF- $\beta$ 1 increased phosphorylation and nuclear accumulation  
267 of Smad2/3 (Fig. 5a, b and extended data Fig. 3a, b c), which were blocked by SB43 (Fig. 5a,  
268 b and extended data Fig. 3a, b). Similarly, Smad2/3 phosphorylation and nuclear accumulation  
269 were strongly diminished in the presence of TubA (Fig. 5c, e and extended data Fig. 3d, e), and  
270 this reduction correlated with an hyperacetylation of Smad3 ( $P < 0.05$ , Fig. 5d). TGF- $\beta$   
271 signaling is known to be upregulated in dystrophic muscles<sup>95</sup>. To confirm *in vivo* that HDAC6  
272 inhibition downregulated TGF- $\beta$  signaling, Smad2/3 acetylation and phosphorylation were  
273 evaluated by Western blot in TA muscles of *mdx* mice treated with TubA or DMSO (Fig. 5f,  
274 h). In TubA-treated *mdx* mice, Smad2/3 acetylation on Lys19 was increased by  $74\% \pm 24\%$   
275 compared to DMSO-treated *mdx* mice ( $P < 0.05$ ; Fig. 5g). This increase in acetylation was  
276 paralleled by a  $55\% \pm 4\%$  decrease of Smad3 phosphorylation on Ser432-425 ( $P < 0.05$ ; Fig.  
277 5i).

## 278 Discussion

279 Here, we have evaluated the effect of HDAC6 inhibition by TubA in *mdx* mice and in C2C12  
280 muscle cells. TubA treatment significantly ameliorated *mdx* muscle function and decreased the  
281 overall histopathological dystrophic features. In search of the mechanism of action of HDAC6,  
282 we discovered that HDAC6 regulated TGF- $\beta$  signaling *via* the acetylation of Smad2/3, thus  
283 identifying Smad2/3 as new targets of HDAC6. TubA increased Smad2/3 acetylation,  
284 preventing Smad2/3 phosphorylation and nuclear translocation, thereby decreasing the  
285 expression of atrogenes such as MAFbx and MuRF1 and upregulating the mTOR pathway.  
286 Altogether, this mechanism can explain the beneficial effect of HDAC6 inhibition to counter  
287 muscle atrophy and fibrosis in *mdx* muscles (Fig.6).

288 Our results indicate that stabilizing microtubules by preventing their deacetylation *via* HDAC6  
289 restores normal microtubule organization in dystrophin-deficient muscles. In these *mdx*  
290 muscles, the loss of force production is commonly attributed to structural impairments of the

291 muscle fiber cytoskeleton and changes in signaling<sup>96</sup>. Interestingly, stabilization of the  
292 microtubule network was shown to protect against contraction-induced injury, suggesting that  
293 targeting the microtubule cytoskeleton may provide novel opportunities for therapeutic  
294 intervention in DMD<sup>74</sup>. Accordingly, *mdx* muscles treated with TubA contain less  
295 centronucleated fibers, possibly because muscle fibers are more resistant.

296 Our data show that TubA partially restores NMJ morphology in *mdx* mice. In DMD patients  
297 and *mdx* mice, NMJs are noticeably disorganized and have been shown to be associated with  
298 deficits in neuromuscular function / transmission, thus highlighting the contribution of NMJ  
299 impairment in altered function and recovery of dystrophic muscles<sup>80,97-99</sup>. We recently showed  
300 that HDAC6 is involved in microtubules organization at the NMJ, by regulating AChR  
301 distribution and NMJ organization<sup>54</sup>. In *mdx* mice, structural changes in microtubules at the  
302 NMJ are probably involved in the disorganization of the NMJ<sup>82</sup>. Our present study indicates  
303 that and protecting NMJ structure by stabilizing microtubules probably participates to the  
304 beneficial effect of TubA treatment on *mdx* muscle function. In addition, a significant increase  
305 of Utrophin A levels correlates with improved prognosis in DMD patients<sup>100</sup>. Therefore, the  
306 ability of HDAC6 inhibition to increase extra-synaptic Utrophin A levels probably participates  
307 to the preservation of *mdx* muscle integrity. How HDAC6 regulates Utrophin remains to be  
308 determined. A plausible hypothesis would be that the restoration of the microtubule network  
309 improves Utrophin trafficking to the membrane.

310 In contrast to most HDACs that directly act on gene expression *via* transcription regulatory  
311 complexes, HDAC6 is strictly cytoplasmic and none of its known substrates are transcription  
312 factors. Here we show that HDAC6 deacetylates Smad2/3 and regulates its nuclear  
313 accumulation. Smad2/3 proteins mediate the action of TGF- $\beta$  signaling to promote protein  
314 catabolism and fibrosis and to inhibit protein anabolism. Inhibition of Smad2/3 nuclear  
315 accumulation by HDAC6 inhibition can therefore explain the beneficial effect of TubA on  
316 atrophy reduction and protein synthesis stimulation *via* the mTOR pathway. Beneficial effects  
317 of HDAC inhibitors such as Givinostat were previously demonstrated in *mdx* mice and DMD  
318 patients that stimulate the expression of the activin binding protein follistatin, whose main  
319 activity is to block TGF- $\beta$  signaling<sup>27,32,33</sup>. These beneficial effects of HDAC6 on *mdx* muscles  
320 recapitulate effects of Givinostat. Moreover, in *mdx* and DMD patient muscles, inhibition of  
321 TGF- $\beta$  activity attenuates both degeneration and fibro-calcification in *mdx* muscle<sup>101</sup> and  
322 fibrosis<sup>27</sup>. Consistently, HDAC6 inhibition also reduced fibrosis in *mdx* muscles.

323 Interestingly, rather than directly affecting the expression of individual genes as shown for other  
324 HDACs, HDAC6 acts on TGF- $\beta$  signaling by targeting Smad2/3 proteins in the cytoplasm  
325 before their translocation into the nucleus. Hence, HDAC6 regulates the downstream targets of  
326 Smad2/3, thus providing a novel pharmacological entry to interfere with TGF- $\beta$  signaling.  
327 Smad2 and Smad3 share 92% sequence identity but their functions are not completely  
328 redundant. Smad2 knock-out mice die at embryonic day 10.5 with vascular and cranial  
329 abnormalities and impaired left-right patterning<sup>102,103</sup> whereas Smad3 knock-out mice are  
330 *viable* but suffer from impaired immune function and chronic inflammation<sup>104,105</sup>. In addition,  
331 they exhibit preferences for association with specific transcription factors. For example, Smad3  
332 interacts preferentially with FoxO over Smad2<sup>34</sup>. Interestingly, acetylation events reported for  
333 Smad2/3 this far are performed by nuclear factors<sup>89,90</sup>. Consistently most of these events have  
334 been shown to regulate promoter binding, transactivation activity, nuclear export or protein  
335 stability. In the nucleus, Smad2 and Smad3 are both acetylated at lysine 19 by p300/CBP in  
336 response to TGF- $\beta$ , which increases their DNA binding activity and binding to target genes  
337 promoters<sup>106</sup>. Acetylation of Smad2 and Smad3 may selectively up- or down-regulate the  
338 expression of TGF- $\beta$ -regulated genes. Of note, Smad2 and Smad3 can also be acetylated on  
339 several other lysines<sup>89,90</sup>. HDAC6 being strictly cytoplasmic, Smad deacetylation by HDAC6  
340 probably affects different processes. Our results indicate that increasing Smad2/3 acetylation  
341 reduces their phosphorylation and then nuclear accumulation. We can thus speculate that  
342 preventing Smad2/3 deacetylation in the cytoplasm reduces their phosphorylation by TGF- $\beta$   
343 receptors and/or reduce their association with Smad4. Altogether, Smad2/3 acetylation in the  
344 nucleus is required to activate the expression of their target genes, whereas of Smad2/3  
345 acetylation in the cytoplasm inhibits their function. Intriguingly, HDAC6 inhibition in C2C12  
346 cells affects only Smad3 acetylation but both Smad2 and 3 phosphorylation. In muscle treated  
347 with TubA, the acetylation of both Smad2 and 3 was reduced. This could reflect an intrinsic  
348 difference between cultured muscle cells and muscle fibers or it could just be due to the fact  
349 that durations of *in vitro* and *in vivo* treatments were very different.

350 It is conceivable that after its activation by p300, acetylated Smad2/3 molecules that are  
351 exported back from the nucleus to the cytoplasm require deacetylation by HDAC6 to allow  
352 their re-entry in the TGF- $\beta$  pathway. Therefore, HDAC6 inhibition would prevent Smad2/3  
353 deacetylation in the cytoplasm thereby reducing the amount of Smad2/3 available to participate  
354 to TGF- $\beta$  signaling and increasing the amount of cytoplasmic Smad2/3. Another possibility  
355 would be that Smad2/3 deacetylation by HDAC6 regulates its ubiquitination and subsequent

356 degradation. Both hypothesis are consistent with the fact that HDAC6 inhibition increases the  
357 amount of cytoplasmic Smad2/3 protein.

358 In a previous work, we showed that HDAC6 expression was increased during muscle atrophy  
359 and that it participated to muscle wasting *via* a direct interaction with the ubiquitin ligase  
360 MAFbx<sup>41</sup>. Therefore, we propose that HDAC6 inhibition prevents the degradation of muscle  
361 proteins at two levels: inhibition of TGF- $\beta$  signaling *via* Smad2/3 and inhibition of  
362 ubiquitination and subsequent degradation of MAFbx substrates. The inhibition of TGF- $\beta$   
363 signaling was also shown to be beneficial to limit cachexia and cancer progression in mouse  
364 models<sup>107,108</sup>. Many tumors secrete TGF- $\beta$  and the finding that HDAC6 regulates TGF- $\beta$  might  
365 also be relevant to explain the beneficial effects observed on cancer progression with HDAC6  
366 inhibitors<sup>51,52,109</sup>.

367 Altogether our results show that HDAC6 pharmacological inhibition significantly ameliorates  
368 dystrophic dystrophic-deficient muscles *via* three complementary mechanisms (Fig. 6): i)  
369 microtubule stabilization that favors NMJ and DGC restoration, ii) increase in Utrophin A  
370 levels, iii) inhibition of TGF- $\beta$  signaling *via* Smad2/3 targeting to reduce muscle atrophy and  
371 fibrosis and to stimulate protein synthesis.

372

373

- 374 1. Mendell, J. R. *et al.* Eteplirsen for the treatment of Duchenne muscular dystrophy. *Ann Neurol*  
375 **74**, 637–647 (2013).
- 376 2. Moat, S. J., Bradley, D. M., Salmon, R., Clarke, A. & Hartley, L. Newborn bloodspot screening for  
377 Duchenne muscular dystrophy: 21 years experience in Wales (UK). *Eur J Hum Genet* **21**, 1049–  
378 1053 (2013).
- 379 3. Straub, V. *et al.* Stakeholder cooperation to overcome challenges in orphan medicine  
380 development: the example of Duchenne muscular dystrophy. *Lancet Neurol* **15**, 882–890  
381 (2016).
- 382 4. Ricotti, V. *et al.* The NorthStar Ambulatory Assessment in Duchenne muscular dystrophy:  
383 considerations for the design of clinical trials. *J Neurol Neurosurg Psychiatry* **87**, 149–155  
384 (2016).
- 385 5. Emery, A. E. H. The muscular dystrophies. *Lancet* **359**, 687–695 (2002).
- 386 6. Kim, S. *et al.* Corticosteroid Treatments in Males With Duchenne Muscular Dystrophy:  
387 Treatment Duration and Time to Loss of Ambulation. *J Child Neurol* **30**, 1275–1280 (2015).
- 388 7. Moxley, R. T., Pandya, S., Ciafaloni, E., Fox, D. J. & Campbell, K. Change in natural history of  
389 Duchenne muscular dystrophy with long-term corticosteroid treatment: implications for  
390 management. *J Child Neurol* **25**, 1116–1129 (2010).
- 391 8. Ervasti, J. M. & Campbell, K. P. Membrane organization of the dystrophin-glycoprotein complex.  
392 *Cell* **66**, 1121–1131 (1991).
- 393 9. Ervasti, J. M. & Campbell, K. P. A role for the dystrophin-glycoprotein complex as a  
394 transmembrane linker between laminin and actin. *J Cell Biol* **122**, 809–823 (1993).
- 395 10. Prins, K. W. *et al.* Dystrophin is a microtubule-associated protein. *J. Cell Biol.* **186**, 363–369  
396 (2009).
- 397 11. Garbincius, J. F. & Michele, D. E. Dystrophin–glycoprotein complex regulates muscle nitric oxide  
398 production through mechanoregulation of AMPK signaling. *Proc Natl Acad Sci U S A* **112**,  
399 13663–13668 (2015).

- 400 12. Le, S. *et al.* Dystrophin As A Molecular Shock Absorber. *ACS Nano* **12**, 12140–12148 (2018).
- 401 13. Weller, B., Karpati, G. & Carpenter, S. Dystrophin-deficient mdx muscle fibers are preferentially  
402 vulnerable to necrosis induced by experimental lengthening contractions. *J Neurol Sci* **100**, 9–13  
403 (1990).
- 404 14. Petrof, B. J., Shrager, J. B., Stedman, H. H., Kelly, A. M. & Sweeney, H. L. Dystrophin protects the  
405 sarcolemma from stresses developed during muscle contraction. *Proc Natl Acad Sci U S A* **90**,  
406 3710–3714 (1993).
- 407 15. Dellorusso, C., Crawford, R. W., Chamberlain, J. S. & Brooks, S. V. Tibialis anterior muscles in  
408 mdx mice are highly susceptible to contraction-induced injury. *J Muscle Res Cell Motil* **22**, 467–  
409 475 (2001).
- 410 16. Gumerson, J. D., Kabaeva, Z. T., Davis, C. S., Faulkner, J. A. & Michele, D. E. Soleus muscle in  
411 glycosylation-deficient muscular dystrophy is protected from contraction-induced injury. *Am J*  
412 *Physiol Cell Physiol* **299**, C1430-1440 (2010).
- 413 17. Alexakis, C., Partridge, T. & Bou-Gharios, G. Implication of the satellite cell in dystrophic muscle  
414 fibrosis: a self-perpetuating mechanism of collagen overproduction. *Am J Physiol Cell Physiol*  
415 **293**, C661-669 (2007).
- 416 18. Vidal, B. *et al.* Fibrinogen drives dystrophic muscle fibrosis via a TGFbeta/alternative  
417 macrophage activation pathway. *Genes Dev* **22**, 1747–1752 (2008).
- 418 19. Villalta, S. A., Nguyen, H. X., Deng, B., Gotoh, T. & Tidball, J. G. Shifts in macrophage phenotypes  
419 and macrophage competition for arginine metabolism affect the severity of muscle pathology  
420 in muscular dystrophy. *Hum Mol Genet* **18**, 482–496 (2009).
- 421 20. Lesault, P.-F. *et al.* Macrophages improve survival, proliferation and migration of engrafted  
422 myogenic precursor cells into MDX skeletal muscle. *PLoS One* **7**, e46698 (2012).
- 423 21. Saclier, M. *et al.* Nutritional intervention with cyanidin hinders the progression of muscular  
424 dystrophy. *Cell Death Dis* **11**, 127 (2020).



- 425 22. Domenger, C. *et al.* RNA-Seq Analysis of an Antisense Sequence Optimized for Exon Skipping in  
426 Duchenne Patients Reveals No Off-Target Effect. *Mol Ther Nucleic Acids* **10**, 277–291 (2018).
- 427 23. Long, C. *et al.* Correction of diverse muscular dystrophy mutations in human engineered heart  
428 muscle by single-site genome editing. *Sci Adv* **4**, eaap9004 (2018).
- 429 24. Péladeau, C. *et al.* Combinatorial therapeutic activation with heparin and AICAR stimulates  
430 additive effects on utrophin A expression in dystrophic muscles. *Hum Mol Genet* **25**, 24–43  
431 (2016).
- 432 25. Péladeau, C., Adam, N. J. & Jasmin, B. J. Celecoxib treatment improves muscle function in mdx  
433 mice and increases utrophin A expression. *FASEB J.* **32**, 5090–5103 (2018).
- 434 26. Ljubicic, V. & Jasmin, B. J. Metformin increases peroxisome proliferator-activated receptor  $\gamma$  Co-  
435 activator-1 $\alpha$  and utrophin a expression in dystrophic skeletal muscle. *Muscle Nerve* **52**, 139–  
436 142 (2015).
- 437 27. Bettica, P. *et al.* Histological effects of givinostat in boys with Duchenne muscular dystrophy.  
438 *Neuromuscul. Disord.* **26**, 643–649 (2016).
- 439 28. Jasmin, B. J. *et al.* Multiple regulatory events controlling the expression and localization of  
440 utrophin in skeletal muscle fibers: insights into a therapeutic strategy for Duchenne muscular  
441 dystrophy. *J. Physiol. Paris* **96**, 31–42 (2002).
- 442 29. Tinsley, J. M. *et al.* Amelioration of the dystrophic phenotype of mdx mice using a truncated  
443 utrophin transgene. *Nature* **384**, 349–353 (1996).
- 444 30. Perkins, K. J. & Davies, K. E. The role of utrophin in the potential therapy of Duchenne muscular  
445 dystrophy. *Neuromuscul Disord* **12 Suppl 1**, S78-89 (2002).
- 446 31. Manzur, A. Y., Kuntzer, T., Pike, M. & Swan, A. Glucocorticoid corticosteroids for Duchenne  
447 muscular dystrophy. *Cochrane Database Syst Rev* CD003725 (2008)  
448 doi:10.1002/14651858.CD003725.pub3.
- 449 32. Iezzi, S. *et al.* Deacetylase inhibitors increase muscle cell size by promoting myoblast  
450 recruitment and fusion through induction of follistatin. *Dev. Cell* **6**, 673–684 (2004).

- 451 33. Minetti, G. C. *et al.* Functional and morphological recovery of dystrophic muscles in mice  
452 treated with deacetylase inhibitors. *Nat. Med.* **12**, 1147–1150 (2006).
- 453 34. Massagué, J., Seoane, J. & Wotton, D. Smad transcription factors. *Genes Dev* **19**, 2783–2810  
454 (2005).
- 455 35. Miyazono, K. Positive and negative regulation of TGF-beta signaling. *J Cell Sci* **113 ( Pt 7)**, 1101–  
456 1109 (2000).
- 457 36. Cussonneau, L. *et al.* Concurrent BMP Signaling Maintenance and TGF- $\beta$  Signaling Inhibition Is a  
458 Hallmark of Natural Resistance to Muscle Atrophy in the Hibernating Bear. *Cells* **10**, 1873  
459 (2021).
- 460 37. Verdel, A. & Khochbin, S. Identification of a new family of higher eukaryotic histone  
461 deacetylases. Coordinate expression of differentiation-dependent chromatin modifiers. *J Biol*  
462 *Chem* **274**, 2440–2445 (1999).
- 463 38. Grozinger, C. M., Hassig, C. A. & Schreiber, S. L. Three proteins define a class of human histone  
464 deacetylases related to yeast Hda1p. *Proc Natl Acad Sci U S A* **96**, 4868–4873 (1999).
- 465 39. Bertaglia, E., Coletto, L. & Sandri, M. Posttranslational modifications control FoxO3 activity  
466 during denervation. *Am. J. Physiol., Cell Physiol.* **302**, C587-596 (2012).
- 467 40. Moresi, V. *et al.* Myogenin and class II HDACs control neurogenic muscle atrophy by inducing E3  
468 ubiquitin ligases. *Cell* **143**, 35–45 (2010).
- 469 41. Ratti, F. *et al.* Histone deacetylase 6 is a FoxO transcription factor-dependent effector in  
470 skeletal muscle atrophy. *J. Biol. Chem.* **290**, 4215–4224 (2015).
- 471 42. Kanno, K. *et al.* Overexpression of histone deacetylase 6 contributes to accelerated migration  
472 and invasion activity of hepatocellular carcinoma cells. *Oncol. Rep.* **28**, 867–873 (2012).
- 473 43. Deskin, B. *et al.* Inhibition of HDAC6 Attenuates Tumor Growth of Non-Small Cell Lung Cancer.  
474 *Transl Oncol* **13**, 135–145 (2019).
- 475 44. Taes, I. *et al.* Hdac6 deletion delays disease progression in the SOD1G93A mouse model of ALS.  
476 *Hum. Mol. Genet.* **22**, 1783–1790 (2013).

- 477 45. d'Ydewalle, C. *et al.* HDAC6 inhibitors reverse axonal loss in a mouse model of mutant HSPB1-  
478 induced Charcot-Marie-Tooth disease. *Nat. Med.* **17**, 968–974 (2011).
- 479 46. Butler, K. V. *et al.* Rational design and simple chemistry yield a superior, neuroprotective  
480 HDAC6 inhibitor, tubastatin A. *J. Am. Chem. Soc.* **132**, 10842–10846 (2010).
- 481 47. Gold, W. A., Lacina, T. A., Cantrill, L. C. & Christodoulou, J. MeCP2 deficiency is associated with  
482 reduced levels of tubulin acetylation and can be restored using HDAC6 inhibitors. *J Mol Med*  
483 *(Berl)* **93**, 63–72 (2015).
- 484 48. Ehnert, S. *et al.* Extremely low frequency pulsed electromagnetic fields cause antioxidative  
485 defense mechanisms in human osteoblasts via induction of •O<sub>2</sub><sup>-</sup> and H<sub>2</sub>O<sub>2</sub>. *Sci Rep* **7**, 14544  
486 (2017).
- 487 49. Saito, S. *et al.* Tubastatin ameliorates pulmonary fibrosis by targeting the TGFβ-PI3K-Akt  
488 pathway. *PLoS One* **12**, e0186615 (2017).
- 489 50. Gu, S. *et al.* Loss of α-Tubulin Acetylation Is Associated with TGF-β-induced Epithelial-  
490 Mesenchymal Transition. *J Biol Chem* **291**, 5396–5405 (2016).
- 491 51. Thakur, N. *et al.* Smad7 Enhances TGF-β-Induced Transcription of c-Jun and HDAC6 Promoting  
492 Invasion of Prostate Cancer Cells. *iScience* 101470 (2020) doi:10.1016/j.isci.2020.101470.
- 493 52. Deskin, B., Lasky, J., Zhuang, Y. & Shan, B. Requirement of HDAC6 for activation of Notch1 by  
494 TGF-β1. *Sci Rep* **6**, 31086 (2016).
- 495 53. Zhang, T. *et al.* HDAC6 regulates primordial follicle activation through mTOR signaling pathway.  
496 *Cell Death Dis* **12**, 559 (2021).
- 497 54. Osseni, A. *et al.* HDAC6 regulates microtubule stability and clustering of AChRs at  
498 neuromuscular junctions. *J Cell Biol* **219**, (2020).
- 499 55. Ota, S., Zhou, Z.-Q., Romero, M. P., Yang, G. & Hurlin, P. J. HDAC6 deficiency or inhibition blocks  
500 FGFR3 accumulation and improves bone growth in a model of achondroplasia. *Hum. Mol.*  
501 *Genet.* (2016) doi:10.1093/hmg/ddw255.

- 502 56. Tinsley, J. M. *et al.* Daily treatment with SMTC1100, a novel small molecule utrophin  
503 upregulator, dramatically reduces the dystrophic symptoms in the mdx mouse. *PLoS One* **6**,  
504 e19189 (2011).
- 505 57. Jahnke, V. E. *et al.* Metabolic remodeling agents show beneficial effects in the dystrophin-  
506 deficient mdx mouse model. *Skelet Muscle* **2**, 16 (2012).
- 507 58. Miura, P. *et al.* Pharmacological activation of PPARbeta/delta stimulates utrophin A expression  
508 in skeletal muscle fibers and restores sarcolemmal integrity in mature mdx mice. *Hum Mol*  
509 *Genet* **18**, 4640–4649 (2009).
- 510 59. Guiraud, S. *et al.* Identification of serum protein biomarkers for utrophin based DMD therapy.  
511 *Sci Rep* **7**, 43697 (2017).
- 512 60. Péladeau, C. *et al.* Identification of therapeutics that target eEF1A2 and upregulate utrophin A  
513 translation in dystrophic muscles. *Nat Commun* **11**, 1990 (2020).
- 514 61. Fardeau, M. *et al.* [Presence of dystrophine-like protein at the neuromuscular junction in  
515 Duchenne muscular dystrophy and in ‘mdx’ mutant mice]. *C R Acad Sci III* **311**, 197–204 (1990).
- 516 62. Ohlendieck, K. *et al.* Dystrophin-related protein is localized to neuromuscular junctions of adult  
517 skeletal muscle. *Neuron* **7**, 499–508 (1991).
- 518 63. Gramolini, A. O. *et al.* Muscle and neural isoforms of agrin increase utrophin expression in  
519 cultured myotubes via a transcriptional regulatory mechanism. *J Biol Chem* **273**, 736–743  
520 (1998).
- 521 64. Hirst, R. C., McCullagh, K. J. A. & Davies, K. E. Utrophin upregulation in Duchenne muscular  
522 dystrophy. *Acta Myol* **24**, 209–216 (2005).
- 523 65. Fairclough, R. J., Wood, M. J. & Davies, K. E. Therapy for Duchenne muscular dystrophy:  
524 renewed optimism from genetic approaches. *Nat Rev Genet* **14**, 373–378 (2013).
- 525 66. Partridge, T. A. The mdx mouse model as a surrogate for Duchenne muscular dystrophy. *FEBS J*  
526 **280**, 4177–4186 (2013).

- 527 67. Tinsley, J. *et al.* Expression of full-length utrophin prevents muscular dystrophy in mdx mice.  
528 *Nat Med* **4**, 1441–1444 (1998).
- 529 68. Miura, P., Andrews, M., Holcik, M. & Jasmin, B. J. IRES-mediated translation of utrophin A is  
530 enhanced by glucocorticoid treatment in skeletal muscle cells. *PLoS One* **3**, e2309 (2008).
- 531 69. Haggarty, S. J., Koeller, K. M., Wong, J. C., Grozinger, C. M. & Schreiber, S. L. Domain-selective  
532 small-molecule inhibitor of histone deacetylase 6 (HDAC6)-mediated tubulin deacetylation.  
533 *Proc Natl Acad Sci U S A* **100**, 4389–4394 (2003).
- 534 70. Briguet, A., Courdier-Fruh, I., Foster, M., Meier, T. & Magyar, J. P. Histological parameters for  
535 the quantitative assessment of muscular dystrophy in the mdx-mouse. *Neuromuscul. Disord.*  
536 **14**, 675–682 (2004).
- 537 71. Torres, L. F. & Duchen, L. W. The mutant mdx: inherited myopathy in the mouse. Morphological  
538 studies of nerves, muscles and end-plates. *Brain* **110 ( Pt 2)**, 269–299 (1987).
- 539 72. González-Sánchez, J. *et al.* Improvement of Duchenne muscular dystrophy phenotype following  
540 obestatin treatment. *J Cachexia Sarcopenia Muscle* **9**, 1063–1078 (2018).
- 541 73. Belanto, J. J. *et al.* Microtubule binding distinguishes dystrophin from utrophin. *Proc. Natl.*  
542 *Acad. Sci. U.S.A.* **111**, 5723–5728 (2014).
- 543 74. Khairallah, R. J. *et al.* Microtubules underlie dysfunction in duchenne muscular dystrophy. *Sci*  
544 *Signal* **5**, ra56 (2012).
- 545 75. Ralston, E., Lu, Z. & Ploug, T. The organization of the Golgi complex and microtubules in skeletal  
546 muscle is fiber type-dependent. *J. Neurosci.* **19**, 10694–10705 (1999).
- 547 76. Oddoux, S. *et al.* Microtubules that form the stationary lattice of muscle fibers are dynamic and  
548 nucleated at Golgi elements. *J Cell Biol* **203**, 205–213 (2013).
- 549 77. Osseni, A. *et al.* Triadin and CLIMP-63 form a link between triads and microtubules in muscle  
550 cells. *J. Cell. Sci.* **129**, 3744–3755 (2016).
- 551 78. Liu, W. & Ralston, E. A new directionality tool for assessing microtubule pattern alterations.  
552 *Cytoskeleton (Hoboken)* **71**, 230–240 (2014).

- 553 79. Portran, D., Schaedel, L., Xu, Z., Théry, M. & Nachury, M. V. Tubulin acetylation protects long-  
554 lived microtubules against mechanical ageing. *Nat. Cell Biol.* **19**, 391–398 (2017).
- 555 80. Kong, J. & Anderson, J. E. Dystrophin is required for organizing large acetylcholine receptor  
556 aggregates. *Brain Res* **839**, 298–304 (1999).
- 557 81. Marques, M. J., Ferretti, R., Vomero, V. U., Minatel, E. & Neto, H. S. Intrinsic laryngeal muscles  
558 are spared from myonecrosis in the mdx mouse model of Duchenne muscular dystrophy.  
559 *Muscle Nerve* **35**, 349–353 (2007).
- 560 82. Pratt, S. J. P. *et al.* Recovery of altered neuromuscular junction morphology and muscle  
561 function in mdx mice after injury. *Cell. Mol. Life Sci.* **72**, 153–164 (2015).
- 562 83. van der Pijl, E. M. *et al.* Characterization of neuromuscular synapse function abnormalities in  
563 multiple Duchenne muscular dystrophy mouse models. *Eur. J. Neurosci.* **43**, 1623–1635 (2016).
- 564 84. Risson, V. *et al.* Muscle inactivation of mTOR causes metabolic and dystrophin defects leading  
565 to severe myopathy. *J Cell Biol* **187**, 859–874 (2009).
- 566 85. Das, F. *et al.* Akt2 causes TGF $\beta$ -induced dephosphorylation facilitating mTOR to drive  
567 podocyte hypertrophy and matrix protein expression. *PLOS ONE* **13**, e0207285 (2018).
- 568 86. Schiaffino, S., Dyar, K. A., Ciciliot, S., Blaauw, B. & Sandri, M. Mechanisms regulating skeletal  
569 muscle growth and atrophy. *FEBS J* **280**, 4294–4314 (2013).
- 570 87. Sandri, M. *et al.* Signalling pathways regulating muscle mass in ageing skeletal muscle: the role  
571 of the IGF1-Akt-mTOR-FoxO pathway. *Biogerontology* **14**, 303–323 (2013).
- 572 88. Derynck, R. & Zhang, Y. E. Smad-dependent and Smad-independent pathways in TGF- $\beta$  family  
573 signalling. *Nature* **425**, 577–584 (2003).
- 574 89. Tu, A. W. & Luo, K. Acetylation of Smad2 by the co-activator p300 regulates activin and  
575 transforming growth factor beta response. *J Biol Chem* **282**, 21187–21196 (2007).
- 576 90. Inoue, Y. *et al.* Smad3 is acetylated by p300/CBP to regulate its transactivation activity.  
577 *Oncogene* **26**, 500–508 (2007).



- 578 91. Krueger, C. & Hoffmann, F. M. Identification of retinoic acid in a high content screen for agents  
579 that overcome the anti-myogenic effect of TGF-beta-1. *PLoS One* **5**, e15511 (2010).
- 580 92. Yu, H. *et al.* Flt3 ligand promotes the generation of a distinct CD34(+) human natural killer cell  
581 progenitor that responds to interleukin-15. *Blood* **92**, 3647–3657 (1998).
- 582 93. Ishikawa, S. *et al.* Comprehensive profiling of novel epithelial-mesenchymal transition  
583 mediators and their clinical significance in colorectal cancer. *Sci Rep* **11**, 11759 (2021).
- 584 94. Han, M. *et al.* Caveolin-1 Impacts on TGF- $\beta$  Regulation of Metabolic Gene Signatures in  
585 Hepatocytes. *Front Physiol* **10**, 1606 (2019).
- 586 95. Ceco, E. & McNally, E. M. Modifying muscular dystrophy through transforming growth factor- $\beta$ .  
587 *FEBS J* **280**, 4198–4209 (2013).
- 588 96. Lovering, R. M., Michaelson, L. & Ward, C. W. Malformed mdx myofibers have normal  
589 cytoskeletal architecture yet altered EC coupling and stress-induced Ca<sup>2+</sup> signaling. *Am J*  
590 *Physiol Cell Physiol* **297**, C571-580 (2009).
- 591 97. Pratt, S. J. P. *et al.* Effects of in vivo injury on the neuromuscular junction in healthy and  
592 dystrophic muscles. *J Physiol* **591**, 559–570 (2013).
- 593 98. Adams, M. E. *et al.* Absence of alpha-syntrophin leads to structurally aberrant neuromuscular  
594 synapses deficient in utrophin. *J Cell Biol* **150**, 1385–1398 (2000).
- 595 99. Banks, G. B., Chamberlain, J. S. & Froehner, S. C. Truncated dystrophins can influence  
596 neuromuscular synapse structure. *Mol Cell Neurosci* **40**, 433–441 (2009).
- 597 100. Kleopa, K. A., Drousiotou, A., Mavrikiou, E., Ormiston, A. & Kyriakides, T. Naturally occurring  
598 utrophin correlates with disease severity in Duchenne muscular dystrophy. *Hum Mol Genet* **15**,  
599 1623–1628 (2006).
- 600 101. Mázala, D. A. *et al.* TGF- $\beta$ -driven muscle degeneration and failed regeneration underlie disease  
601 onset in a DMD mouse model. *JCI Insight* **5**, 135703 (2020).
- 602 102. Nomura, M. & Li, E. Smad2 role in mesoderm formation, left-right patterning and craniofacial  
603 development. *Nature* **393**, 786–790 (1998).

- 604 103. Waldrip, W. R., Bikoff, E. K., Hoodless, P. A., Wrana, J. L. & Robertson, E. J. Smad2 signaling in  
605 extraembryonic tissues determines anterior-posterior polarity of the early mouse embryo. *Cell*  
606 **92**, 797–808 (1998).
- 607 104. Datto, M. B. *et al.* Targeted disruption of Smad3 reveals an essential role in transforming  
608 growth factor beta-mediated signal transduction. *Mol Cell Biol* **19**, 2495–2504 (1999).
- 609 105. Yang, X. *et al.* Targeted disruption of SMAD3 results in impaired mucosal immunity and  
610 diminished T cell responsiveness to TGF-beta. *EMBO J* **18**, 1280–1291 (1999).
- 611 106. Simonsson, M., Kanduri, M., Grönroos, E., Heldin, C.-H. & Ericsson, J. The DNA binding activities  
612 of Smad2 and Smad3 are regulated by coactivator-mediated acetylation. *J Biol Chem* **281**,  
613 39870–39880 (2006).
- 614 107. Gallot, Y. S. *et al.* Myostatin gene inactivation prevents skeletal muscle wasting in cancer.  
615 *Cancer Res* **74**, 7344–7356 (2014).
- 616 108. Lima, J. D. C. C. *et al.* Tumour-derived transforming growth factor- $\beta$  signalling contributes to  
617 fibrosis in patients with cancer cachexia. *J Cachexia Sarcopenia Muscle* **10**, 1045–1059 (2019).
- 618 109. Shi, Y. *et al.* Elevated expression of HDAC6 in clinical peritoneal dialysis patients and its  
619 pathogenic role on peritoneal angiogenesis. *Ren Fail* **42**, 890–901 (2020).
- 620 110. Chopra, A., Willmore, W. G. & Biggar, K. K. Protein quantification and visualization via  
621 ultraviolet-dependent labeling with 2,2,2-trichloroethanol. *Sci Rep* **9**, 13923 (2019).
- 622 111. Jones, R. A. *et al.* NMJ-morph reveals principal components of synaptic morphology influencing  
623 structure-function relationships at the neuromuscular junction. *Open Biol* **6**, (2016).

624  
625

626

## 627 **Material and Methods**

### 628 **Ethics statement, Animal models, treatments, and preparation of samples**

629 All procedures using animals were approved by the Institutional ethics committee and followed  
630 the guidelines of the National Research Council Guide for the care and use of laboratory  
631 animals, and by University of Ottawa Animal Care Committee. All procedures were in  
632 accordance with the Canadian Council of Animal Care Guidelines. For *in vivo* experiments,  
633 both control C57 black 10 (C57BL10) and C57BL/10ScSn-Dmdmdx/J *mdx* were used (The  
634 Jackson laboratory Bar Harbor, USA). *Mdx* mice were treated for 30 consecutive days with  
635 either tubastatin A (TubA, APExBIO, #A4101; 25 mg/kg/day, intraperitoneally) solubilized in  
636 2% DMSO or saline supplemented with 2% DMSO (vehicle-control)<sup>45</sup>. After treatment,  
637 muscles were dissected and either: i) frozen and crushed in liquid nitrogen for protein and RNA  
638 extraction or ii) embedded in Tissue-Tek OCT compound (VWR, Mississauga, Canada) and  
639 frozen in isopentane cooled with liquid nitrogen for cryostat sectioning<sup>54</sup> or iii) were manually  
640 dissociated<sup>77</sup> with the following modifications: single TA fibers were fixed 30 min at room  
641 temperature in PBS-4% paraformaldehyde, permeabilized 60 min in PBS-1% Triton X-100 at  
642 30°C before saturation and incubation with antibodies as described below.

### 643 **Hindlimb grip strength.**

644 All injections and behavioral tests were performed in a blinded manner at the University of  
645 Ottawa Animal Behavior core facility. For TubA experiments, daily injections were continued  
646 during the behavioral testing period. To minimize interference, injections were performed in  
647 the afternoon after the completion of each test. Before each test, mice were habituated to the  
648 room for at least 30 min and tests were performed under normal light conditions. Mice were  
649 handled once a day for 3 days prior to the first test. Muscle force of each animal was measured  
650 using a Grip Strength Meter (Chatillion DFE II, Columbus Instruments) with all paws (hindlimb  
651 grip strength test). The mouse was moved closer to the meter until it had a firm grip on the  
652 probe. The mouse was pulled horizontally away from the bar at a speed of ~2.5 cm/s, until it  
653 released the probe. The value of the maximal peak force was recorded (gF). This was repeated  
654 five times for each animal, with a waiting time of 10 – 15 s between each measurement. In each  
655 animals at 30 day, the best score was defined as the specific maximal force. The grip strength  
656 measurements were conducted by the same investigator in order to limit variability and were  
657 performed in a random order. The investigator performing the measurements was blinded as to  
658 the treatment group of each individual mouse upon testing.

## 659 **Cell culture**

660 C2C12 cells (ATCC) were seeded on matrigel-coated (matrigel® matrix, Corning) 35 mm-  
661 diameter plates and were maintained as myoblasts in Dulbecco's modified Eagle medium  
662 (DMEM) supplemented with 10% fetal bovine serum and 1% penicillin-streptomycin  
663 (Multicell). Then cells were differentiated in differentiation medium (DMEM medium  
664 supplemented with 2% horse serum, Bio Media Canada). Cells grown in 35 mm diameter plates  
665 were treated for either Western blot or immunofluorescence. For Western blot, cells were  
666 collected by trypsinization, washed with PBS, centrifuged, and stored at -20°C until used. For  
667 immunofluorescence, cells were fixed for 20 min in PBS-4% paraformaldehyde at room  
668 temperature, washed in PBS and stored at 4°C until used.

## 669 **Drug, antibodies, and other reagents.**

670 C2C12 cells were treated with different drugs: tubastatin A (TubA at 5 µM, APExBIO,  
671 #A4101), tubacin (TBC, at 5 µM, Sigma, #SML0065) and SB 431542 (SB43, at 10 µM, Tocris,  
672 # 1614). Recombinant Human TGF-β1 (rhTGF-β1, at 10 ng/mL, # 100-21) was purchased from  
673 PeproTech. All primary antibodies used in this study are presented in table 1. Secondary  
674 antibodies used for immunofluorescence studies were coupled to Alexa-Fluor 488 or Alexa-  
675 Fluor 546 (Molecular Probes); or to Cy3 or Cy5 (Jackson ImmunoResearch Laboratories).  
676 Secondary antibodies used for Western blotting were either horseradish peroxidase (HRP)-  
677 coupled anti-rabbit-IgG polyclonal antibodies (Jackson ImmunoResearch Laboratories) or HRP  
678 goat anti-mouse-IgG antibodies (Millipore). To visualize NMJ for immunofluorescence studies,  
679 we used α-Bungarotoxin at 5 µg/mL conjugates with either Alexa-Fluor 488 (Molecular Probes)  
680 and DAPI (D9542; Sigma-Aldrich) was used to stain nuclear DNA. To visualize and quantify  
681 proteins on Western blot, we used 2,2,2-Trichloroethanol<sup>110</sup> (TCE, Sigma, #T54801).

## 682 **Preparation of muscle and C2C12 cells homogenates**

683 TA muscles were collected from adult mouse hindlimbs and dissected muscles were crushed  
684 on dry ice. Muscle powder resuspended in urea/thiourea buffer [7 M urea, 2 M thiourea, 65 mM  
685 chaps, 100 mM DTT, 10 U DNase I, protease inhibitors (Complete; Roche/Sigma-Aldrich)]  
686 and protein concentration was determined using CB-X Protein Assay kit (G-Bioscience, St.  
687 Louis, MO). After trypsination, C2C12 cells were solubilized in RIPA buffer [50 mM Tris-  
688 HCl, pH 8.0, 150 mM NaCl, 1% NP-40, 0.5% sodium deoxycholate, 0.1% SDS and protease  
689 inhibitors (Complete; Roche/Sigma-Aldrich)]. Protein concentration was determined using the

690 BCA protein assay kit (Pierce/ThermoFisher Scientific) as per the manufacturer's  
691 recommendations.

## 692 **Western blot**

693 Five to twenty  $\mu\text{g}$  of total proteins were separated by SDS-PAGE supplemented with 0.5% TCE  
694 and transferred onto nitrocellulose or PVDF membranes. Non-specific binding was blocked  
695 with 4% bovine serum albumin (BSA, Euromedex) diluted in 1X PBS supplemented with  
696 Tween 0.1%, and membranes were incubated with primary antibodies. After thorough washing  
697 with 0.1% Tween 1X PBS, membranes were incubated with horseradish peroxidase (HRP)-  
698 conjugated secondary antibodies (Jackson Immunoresearch Laboratories/Cederlane). After  
699 additional washes, signals were revealed using ECL substrate reagents (Bio-Rad) and  
700 acquisitions were done using a ChemiDoc<sup>TM</sup> MP Imaging Systems (Bio-Rad) or  
701 autoradiographed with X-Ray films (Fisher Scientific). Quantifications based on TCE  
702 membrane were performed with the Image Lab software (Bio-Rad) or FIJI software (ImageJ  
703 2.0.0-rc-69/1.52n, National Institutes of Health, Bethesda, MD).

## 704 **Muscle histology and histochemistry**

705 Frozen TA muscle samples were placed at  $-20\text{ }^{\circ}\text{C}$  into the cryostat (HM 525 NX, Thermo  
706 Fisher Scientific) for at least 20 min before further processing. 10  $\mu\text{m}$  thick TA muscle sections  
707 were transversally cut. TA muscle cross-sections were stained with Hematoxylin and Eosin  
708 dyes. Sections were dehydrated using 70%, 90%, and 100% ethanol solutions and washed with  
709 toluene. The sections were mounted using Permount (Fisher Scientific) and visualized using an  
710 epifluorescent EVOS FLAuto2 inverted microscope. Percentage of central nucleation was  
711 determined by counting the total number of muscle fibers and the number of centrally nucleated  
712 muscle fibers from 6 to 8 cross-sectional views using the Northern Eclipse Software (NES,  
713 EMPIX Imaging).

## 714 **Immunofluorescence microscopy and image acquisition**

715 Incubations with primary antibodies in PBS-0.1% Tween 20 were performed either at room  
716 temperature for 60 min (C2C12 cells) or at  $4^{\circ}\text{C}$  overnight (isolated dissociated muscle fibers)  
717 and washed. After incubation for 1-3 hours at room temperature with fluorescent secondary  
718 antibodies, DNA nuclear were stained with DAPI for 10 min. Coverslips were mounted on  
719 microscope slides with FluorSave<sup>TM</sup> reagent (Calbiochem). Images were captured at RT on  
720 either a Zeiss LSM880 microscope (Carl Zeiss) with an AiryScan1 detector equipped with a

721 63× 1.4-NA objective at INMG or a Zeiss Axio Imager M2 (Carl Zeiss) upright microscope  
722 equipped with either a 63× 1.4-NA or a 10× 0.45 NA objectives and AxioCam mRm CCD  
723 detector at the University of Ottawa Cell Biology and Image Acquisition core facility. All  
724 images were processed with either the ZEN blue software, Zeiss AxioVision software (Zeiss,  
725 Oberkochen, Germany), Photoshop CS5 (Adobe Systems, San Jose, CA, USA) or FIJI software  
726 (ImageJ 2.0.0-rc-69/1.52n, National Institutes of Health, Bethesda, MD). Images were analyzed  
727 in a blinded manner by randomly renaming file names with numbers using the  
728 ‘name\_randomizer’ macro in ImageJ<sup>77</sup>.

### 729 **Quantitative Microtubule network lattice analysis**

730 Using ImageJ, microtubule organization was visualized with vertical (yellow bars) and  
731 horizontal (blue bars) line scans. Using a recently developed directionality analysis program<sup>78</sup>  
732 (TeDT), microtubule network lattice directionality was calculated for all mouse lines. A two-  
733 way ANOVA was used to assess the effect of microtubule intersection angle across groups.  
734 two-sided U test (Mann-Whitney) post hoc measures were used to determine the extent of  
735 differences between groups. Significance was set at  $P < 0.05$ .

### 736 **Quantitative analysis of compactness and fragmentation index by ‘NMJ-morph’** 737 **methodology**

738 For accurate analysis, each image was captured a single en-face NMJ. NMJs that were partially  
739 oblique to the field of view were only included if the oblique portion constituted less than  
740 approximately 10% of the total area. To quantify compactness and fragmentation index, images  
741 were analyzed thanks to ‘NMJ-morph’ methodology<sup>111</sup>. The compactness of AChRs at the  
742 endplate was defined as follows:  $\text{Compactness} = ((\text{AChR area}) / (\text{endplate area})) \times 100$ .  
743 Fragmentation index was calculated whereby a solid plaque-like endplate has an index of (0),  
744 and highly fragmented endplate has an index that tends towards a numerical value of (1):  
745  $\text{Fragmentation index} = 1 - (1 / (\text{number of AChR cluster}))$ . The basic dimensions of the post-  
746 synaptic motor endplate were measured using standard ImageJ functions. ‘NMJ-morph’ is used  
747 to quantify the number of discrete AChR clusters comprising the motor endplate.

### 748 **Statistical analyses**

749 All statistical analyses were performed using Prism 6.0 (GraphPad Software, La Jolla, USA).  
750 Data are given as mean  $\pm$  SEM. Student’s t-test was used if datasets belong to a normally  
751 distributed population with an  $n > 30$ . Otherwise, the nonparametric, two-sided U test (Mann-



752 Whitney) was applied. Data distribution was assumed to be normal, but this was not formally  
753 tested. For a multiple factorial analysis of variance, two-way ANOVA was applied. P-values  
754 under 0.05 were considered statistically significant (shown as a single asterisk in figures); p-  
755 values under 0.01 were considered highly statistically significant (shown as two asterisks in  
756 figures); p-values under 0.001 were considered very highly statistically significant (shown as  
757 three asterisks in figures).

## 758 **Funding**

759 Funding for this work was obtained *via* a grant from the Association Française contre les  
760 Myopathies (AFM) to B.J.J and L.S. A.O benefited from a Postdoctoral Fellowship from the  
761 AFM during the course of this work. Additional support for this work came from the  
762 MyoNeurALP alliance and the Fondation pour la Recherche Médicale (FRM team), for L.S as  
763 well as the Canadian Institutes of Health Research, for B.J.J.

## 764 **Acknowledgements**

765 We thank John Lunde, Jean Luc Thomas, Amanda Tran, and Laurent Coudert for expert  
766 technical help and fruitful discussion.

## 767 **Author contributions**

768 A.O, B.J.J and L.S conceived the study, designed the project, and obtained grant funding. A.O  
769 and A.R.C performed immunofluorescence and all animal experiments. A.O and I.S performed  
770 TGF- $\beta$  experiments. A.O and Y.G.G. performed mTOR experiments. A.O. and P.L performed  
771 all the Western blots. A.O performed all the culture cell experiments. A.O and L.S wrote the  
772 first draft manuscript. A.O, A.R.C, I.S, Y.G.G, V.M, R.M, P.L, B.J.J and L.S analyzed,  
773 interpreted the data, reviewed, finalized the manuscript, and provided comments and edits.

## 774 **Competing interest**

775 The authors declare no competing financial interests.

## 776 **Additional information**

777 Supplementary information is showed in Table 1: classification of antibodies.

778

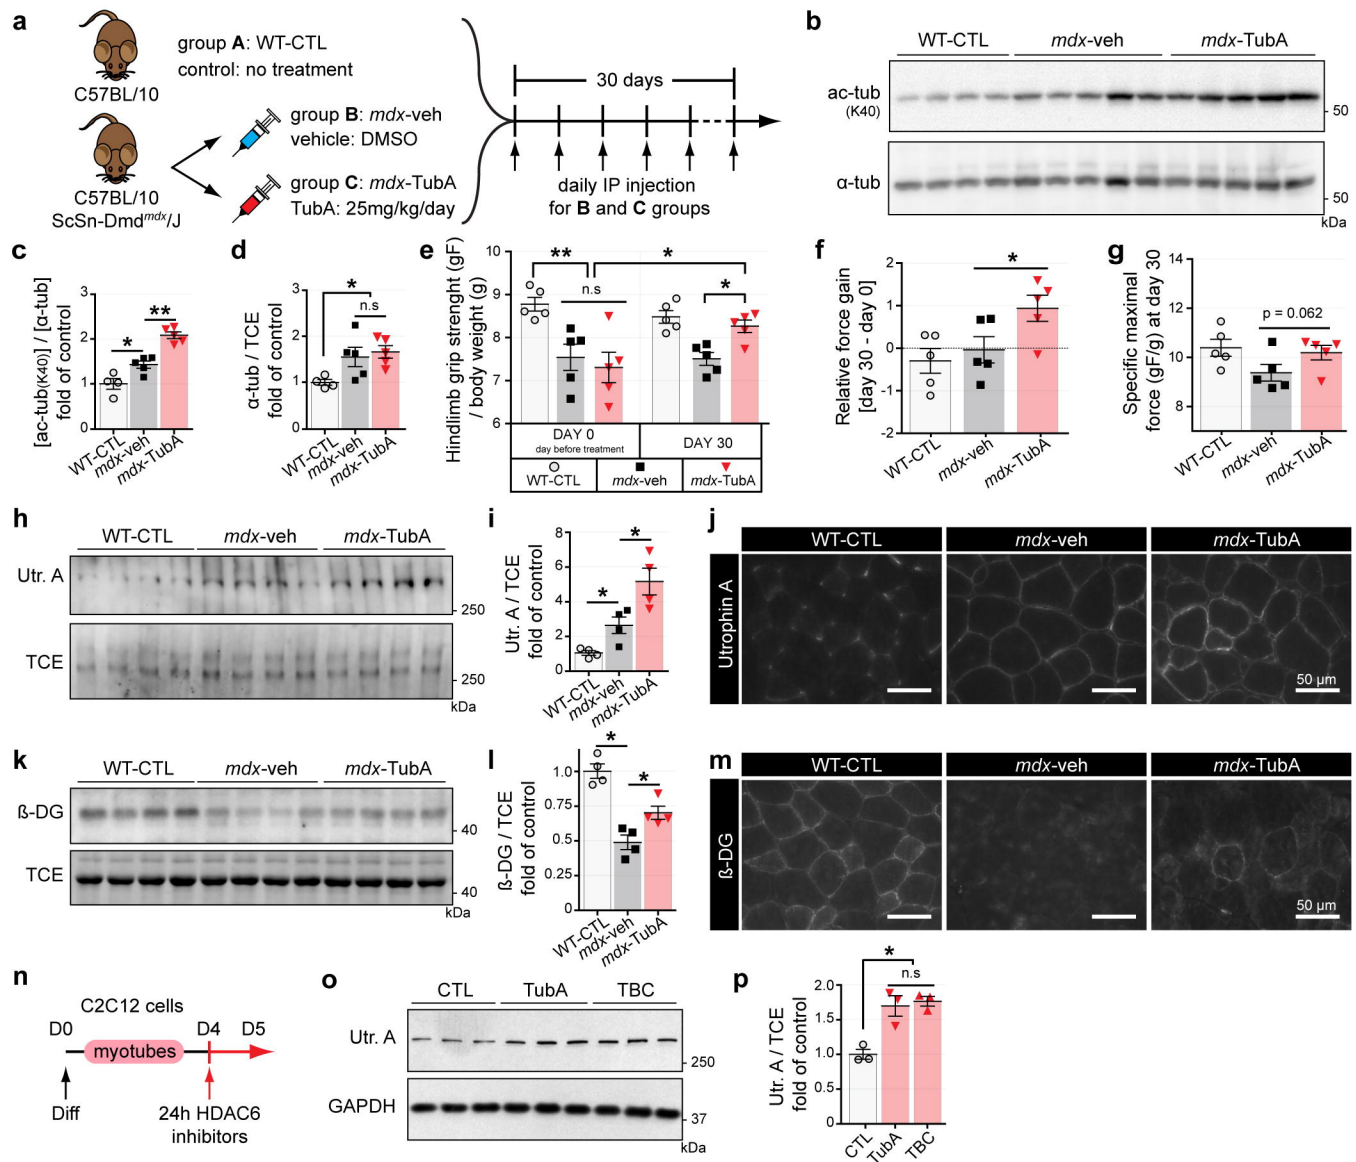

**Fig. 1 | *In vivo* in *mdx* mice, HDAC6 inhibition via TubA treatment increases grip strength, sarcolemmal localization of utrophin A and promotes reassembly of the DGC.** **a**, Protocol of TubA treatment. Three groups of 7-wk-old mice have been evaluated for 4 weeks either without treatment (group A, C57BL/10 mice: WT-CTL), or treated with daily injection for 30 consecutive days with DMSO (group B, C57BL/10ScSn-Dmd<sup>*mdx*</sup>/J mice; *mdx-veh*) or with DMSO supplemented with TubA at 25 mg/kg/day (group C, C57BL/10ScSn-Dmd<sup>*mdx*</sup>/J mice; *mdx-TubA*). **b**, To evaluate the level of tubulin acetylation (ac-tubK40) in TA muscles, Western blot analysis were performed. **c, d**, Quantifications of acetylated tubulin (**c**) and  $\alpha$ -tubulin ( $\alpha$ -tub, **d**) protein levels were respectively normalized to  $\alpha$ -tubulin and TCE (4-5 mice per group). **e**, Grip strength was measured on a grid measuring maximal hindlimb grip strength normalized on body weight (5 mice per group). **f**, Relative force gain was calculated by the difference between grip strength measured at the last day (day 30) and the day before starting treatment (day 0). **g**, Specific maximal force was evaluated by the best score of grip strength obtain in each animals at day 30. **h, i, k, l**, To evaluate levels of Utrophin A (Utr. A) and  $\beta$ -dystroglycan ( $\beta$ -DG) in TA muscles, Western blot analysis (**h, k**) and quantification (**i, l**) were performed. TCE was used as a loading control (4-5 mice per group). **j, m**, Cross sections of TA muscle from WT-CTL, *mdx-veh* or *mdx-TubA* were stained with an antibody against Utrophin A (**j**, in gray) or against  $\beta$ -dystroglycan (**m**, in gray). Scale bars: 50  $\mu$ m. **n**, 4-d-old C2C12 myotubes pretreated for 24 h with different HDAC6 inhibitors TubA (5  $\mu$ M) and tubacin (TBC, 5  $\mu$ M) or with DMSO (CTL, 1  $\mu$ l). **o**, Representative Western blots showing Utrophin A. GAPDH was used as a loading control. **p**, Quantification of Utrophin A protein levels normalized with GAPDH (3 independent experiments quantified). Quantifications show means  $\pm$  SEM. \*,  $P < 0.05$ ; \*\*,  $P < 0.01$ ; n.s., not significant,  $P > 0.05$ ; Mann-Whitney U test. kDa, relative molecular weight in kiloDalton.

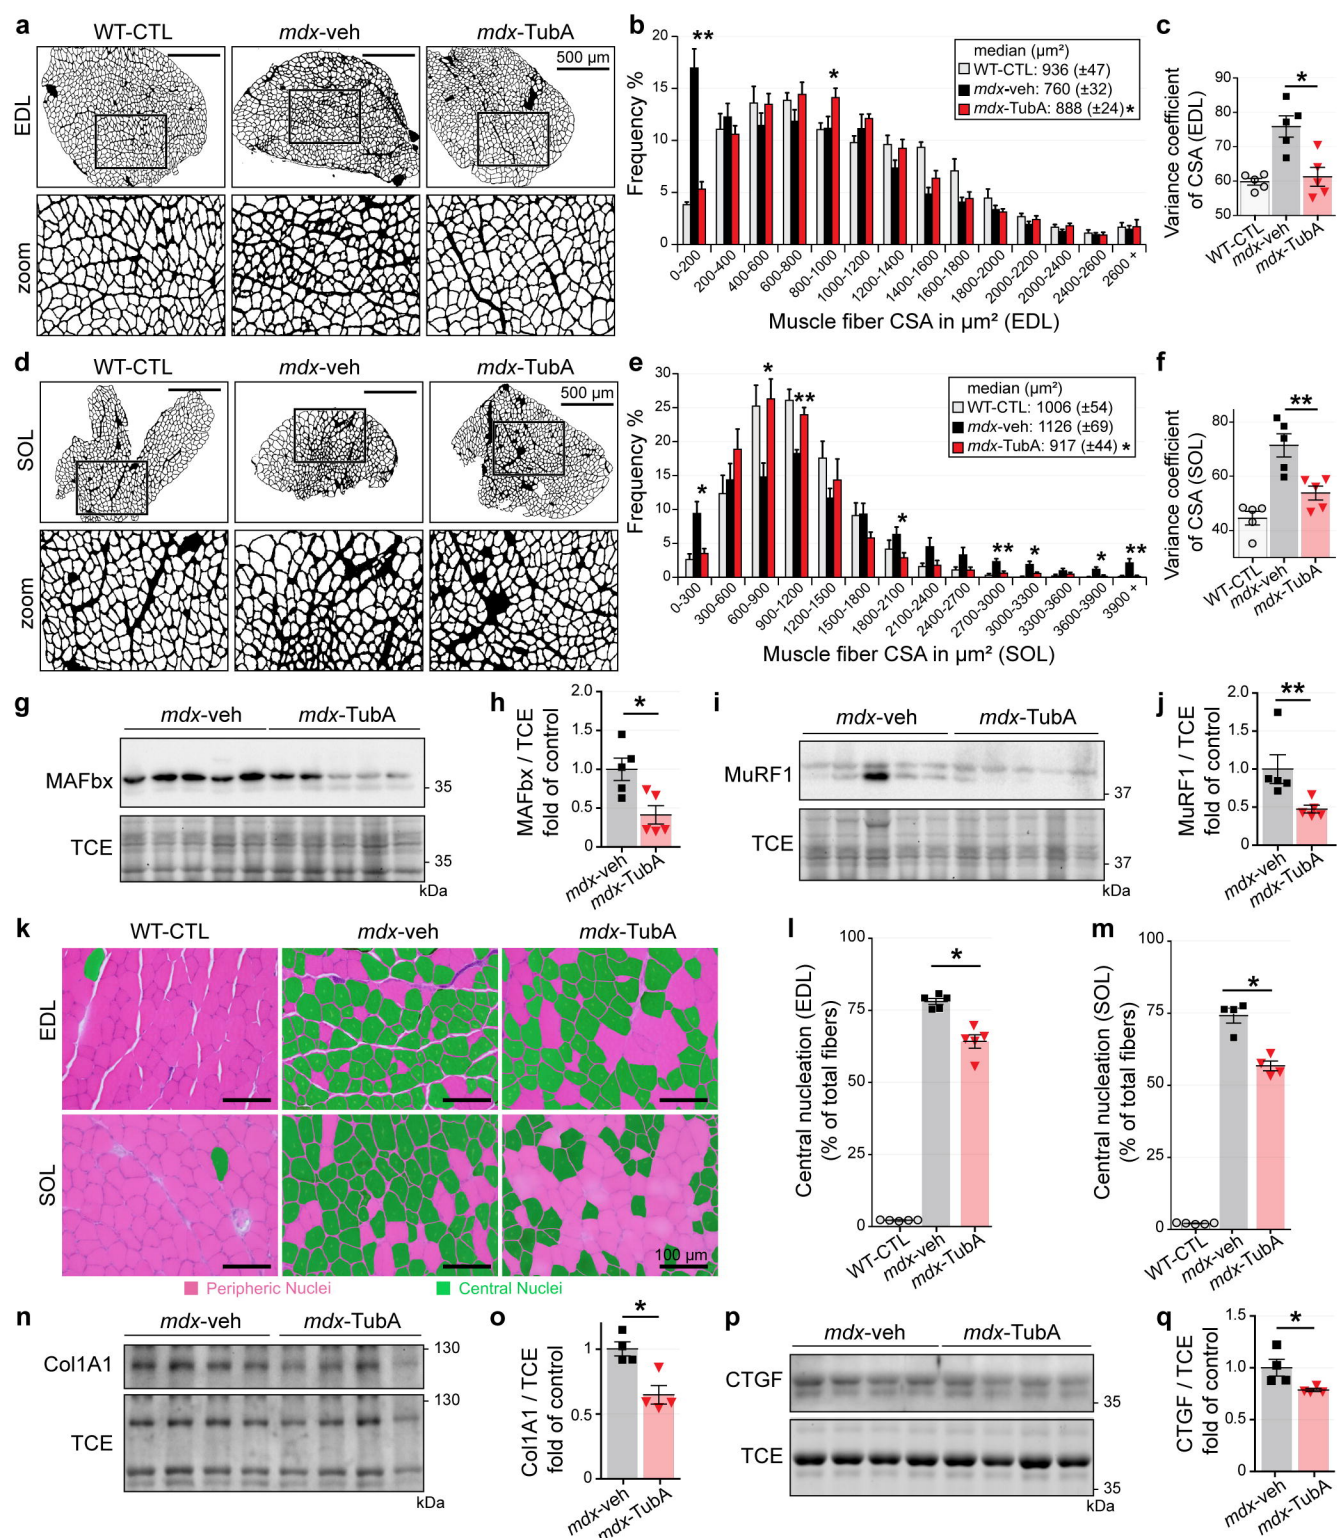

**Fig. 2 | TubA treatment improves and restores DMD phenotype in *mdx* muscle and protects from atrophy.** **a, d**, Cross-section areas (CSA) of entire EDL (**a**) and SOL (**d**) muscles from 11-wk-old C57BL/10 mice (WT-CTL) and C57BL/10ScSn-Dmdmdx/J mice treated with TubA (*mdx-TubA*) or with vehicle-DMSO (*mdx-veh*) for 30 consecutive days were stained using laminin staining and then binarized on ImageJ. Scale bars: 500  $\mu\text{m}$ . **b, e**, Graphical summary of CSA (4-5 mice per group). Quantifications show means  $\pm$  SEM. \*,  $P < 0.05$ ; \*\*,  $P < 0.01$ ; two-way ANOVA (*mdx-TubA* versus *mdx-veh*). Median CSAs of each muscle are displayed above the frequency histograms. **c, f**, Measurements of variance coefficient in EDL (**c**) and SOL (**f**) muscle fibers (4-5 mice per group). **g, h, i, j**, To evaluate levels of MAFbx (**g, h**) and MuRF1 (**i, j**) in TA muscles, Western blot analysis (**g, i**) and quantifications (**h, j**) were performed (5 mice per group). **k**, Representative examples of cross-sections of EDL and SOL muscles were stained using hematoxylin and eosin. Scale bars: 100  $\mu\text{m}$ . Centrally nucleated fibers are colored in green. **l, m**, Percentage of central nucleation in EDL (**l**) and SOL (**m**) muscle fibers (4-5 mice per group). **n, o, p, q**, To evaluate levels of collagen type I alpha 1 (**n, o**, Col1A1) and connective tissue growth factor (**p, q**, CTGF) in TA muscles, Western blot analysis (**n, p**) and quantifications (**o, q**) were performed (4 mice per group). TCE was used as a loading control for all Western blots. Quantifications show means  $\pm$  SEM. \*,  $P < 0.05$ ; \*\*,  $P < 0.01$ ; n.s., not significant,  $P > 0.05$ ; Mann-Whitney U test. kDa, relative molecular weight in kiloDalton.



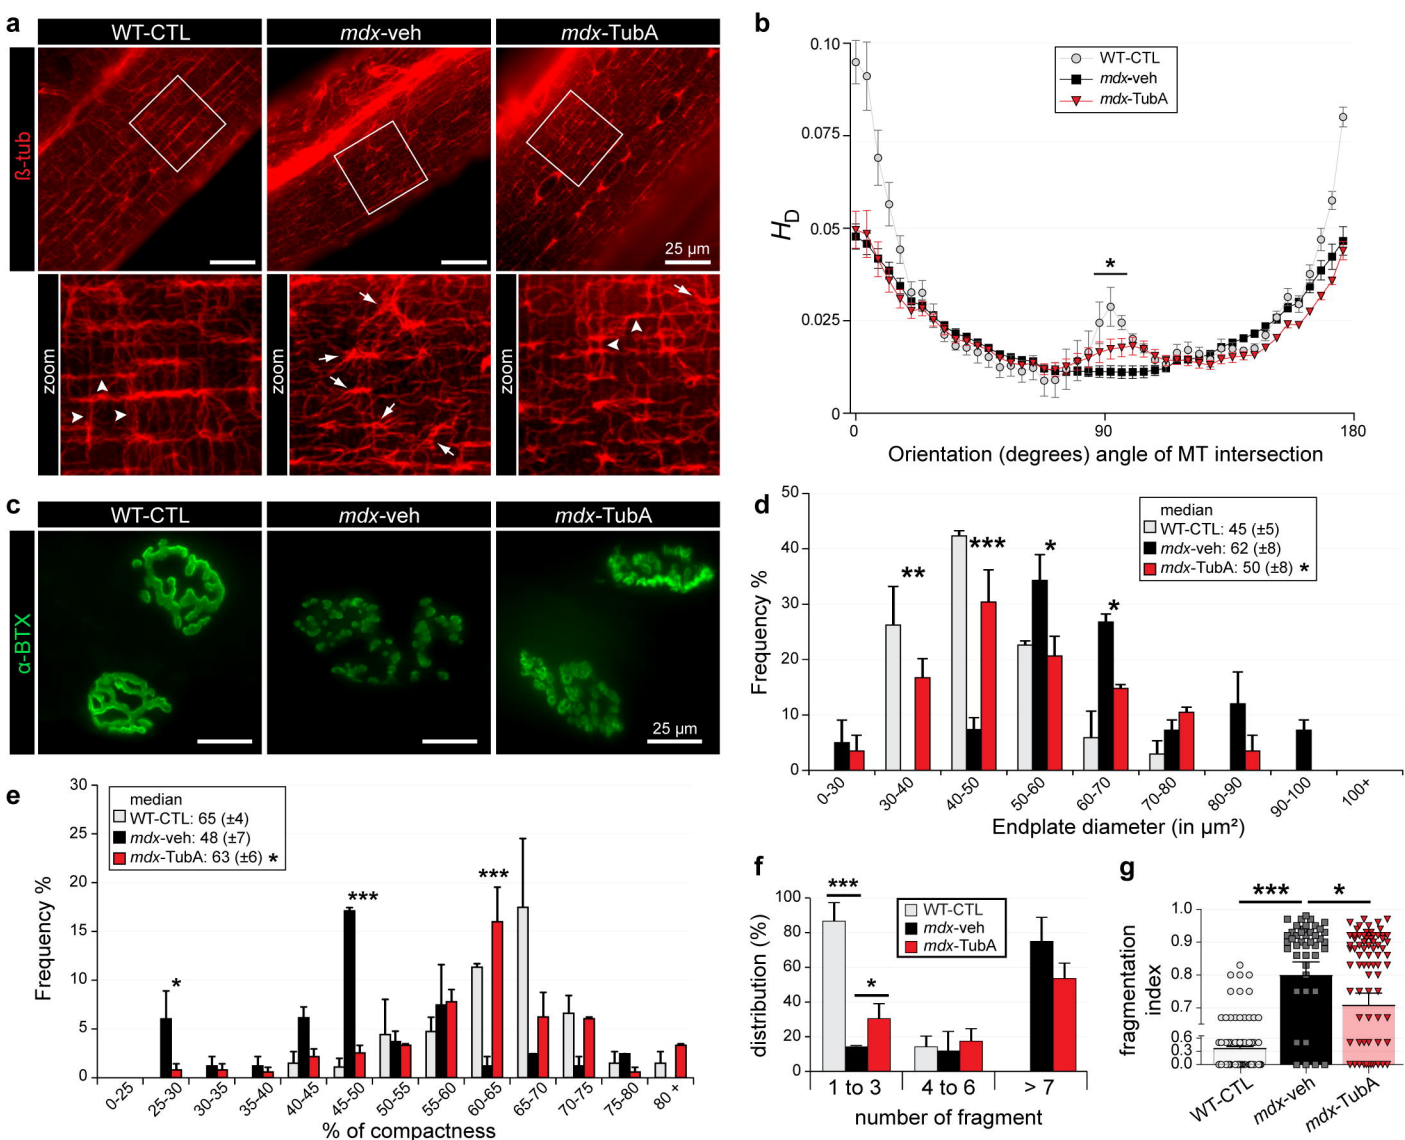

**Fig. 3 | TubA treatment stabilizes MT network and protects NMJ morphological characteristics from dystrophic mice. a, c,** Isolated fibers of TA from 11-wk-old C57BL/10 mice (WT-CTL) and C57BL/10ScSn-Dmdmdx/J mice treated with TubA (*mdx-TubA*) or with vehicle-DMSO (*mdx-veh*) for 30 consecutive were stained with an antibody against  $\beta$ -tubulin to label MT network (**a**, in red) or stained with  $\alpha$ -BTX-A488 (**c**, in green) to label NMJs. Scale bars: 25  $\mu$ m. **b,** MT network organization analysis of four to six fibers from two or three mice using TeDT software. The final generated graph presents a global score for each given degree of MT orientation, with 0 and 180 degrees corresponding to the longitudinal MT and 90 degrees corresponding to the transverse MT. Arrowheads represent regular organization of MT network whereas arrows show disorganization of the MT network, with a loss of the grid-like organization. **d, e,** Graphical summary of NMJ endplate diameter (**d**) and NMJ compactness (**e**). Median CSAs of each muscle are displayed above the frequency histograms (40-75 NMJs counted). **f, g,** Distribution of number of fragments (**f**) and Fragmentation index (**g**) have been quantified (43-73 of NMJs counted). Quantifications show means  $\pm$  SEM. \*,  $P < 0.05$ ; \*\*,  $P < 0.01$ ; \*\*\*,  $P < 0.001$ ; (*mdx-TubA* versus *mdx-veh*), Mann-Whitney U test.

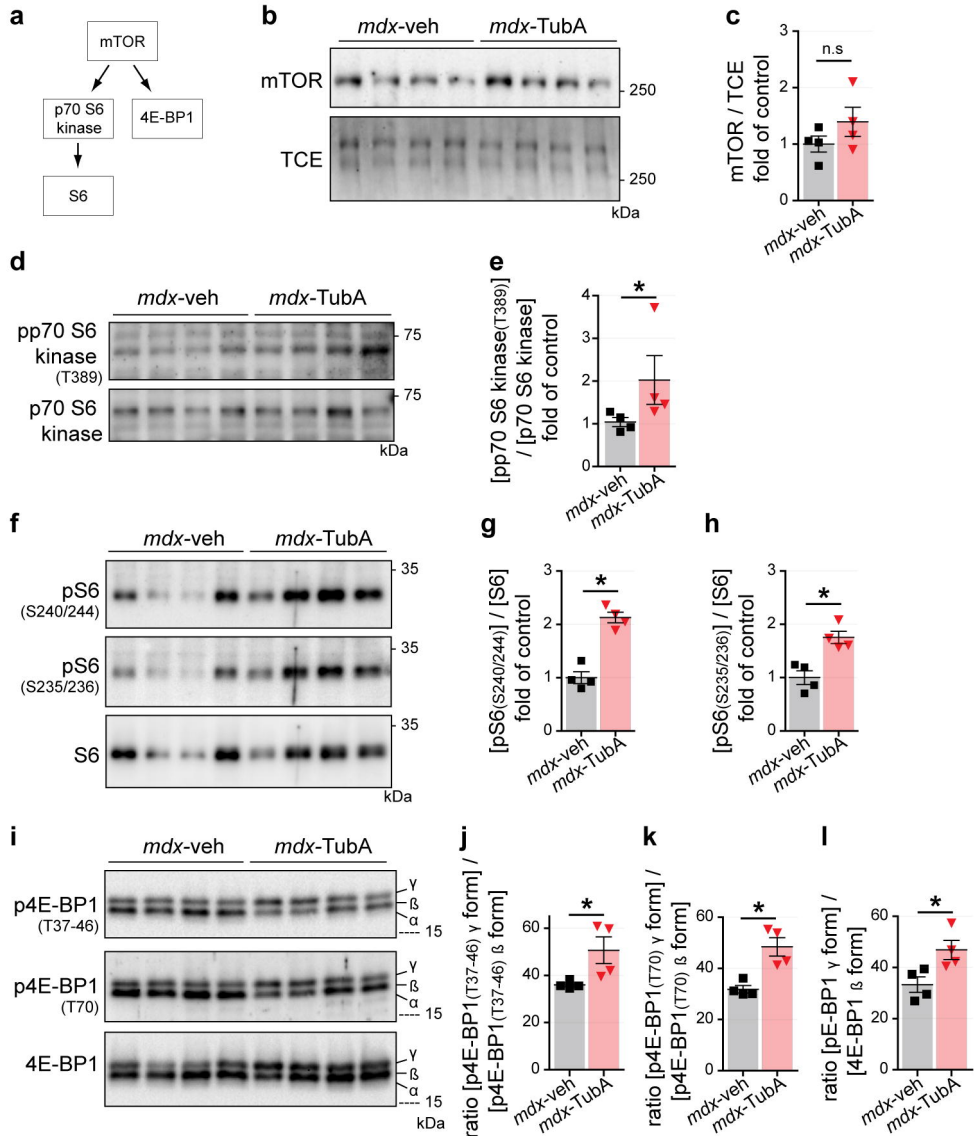

**Fig. 4. | HDAC6 inhibition activates mTOR pathway in *mdx* mice.** **a**, Schematic summary of downstream targets of mTOR pathway. 11-wk-old C57BL/10ScSn-Dmd*mdx*/J mice treated with TubA (*mdx*-TubA) or with vehicle-DMSO (*mdx*-veh) for 30 consecutive days have been analyzed in TA muscle by Western blot analysis (**b**, **d**, **f**, **i**) and quantifications of mTOR (**c**), pp70 S6 kinase (**e**, T389), pS6 (**g**, S240-244), pS6 (**h**, S235/236), p4E-BP1 (**j**, T37/46), p4E-BP1 (**k**, T70), and 4E-BP1 (**l**) were performed (4 mice per group). TCE was used as a loading control. Quantifications show means  $\pm$  SEM. \*,  $P < 0.05$ ; n.s., not significant,  $P > 0.05$ ; Mann-Whitney U test. kDa, relative molecular weight in kiloDalton.

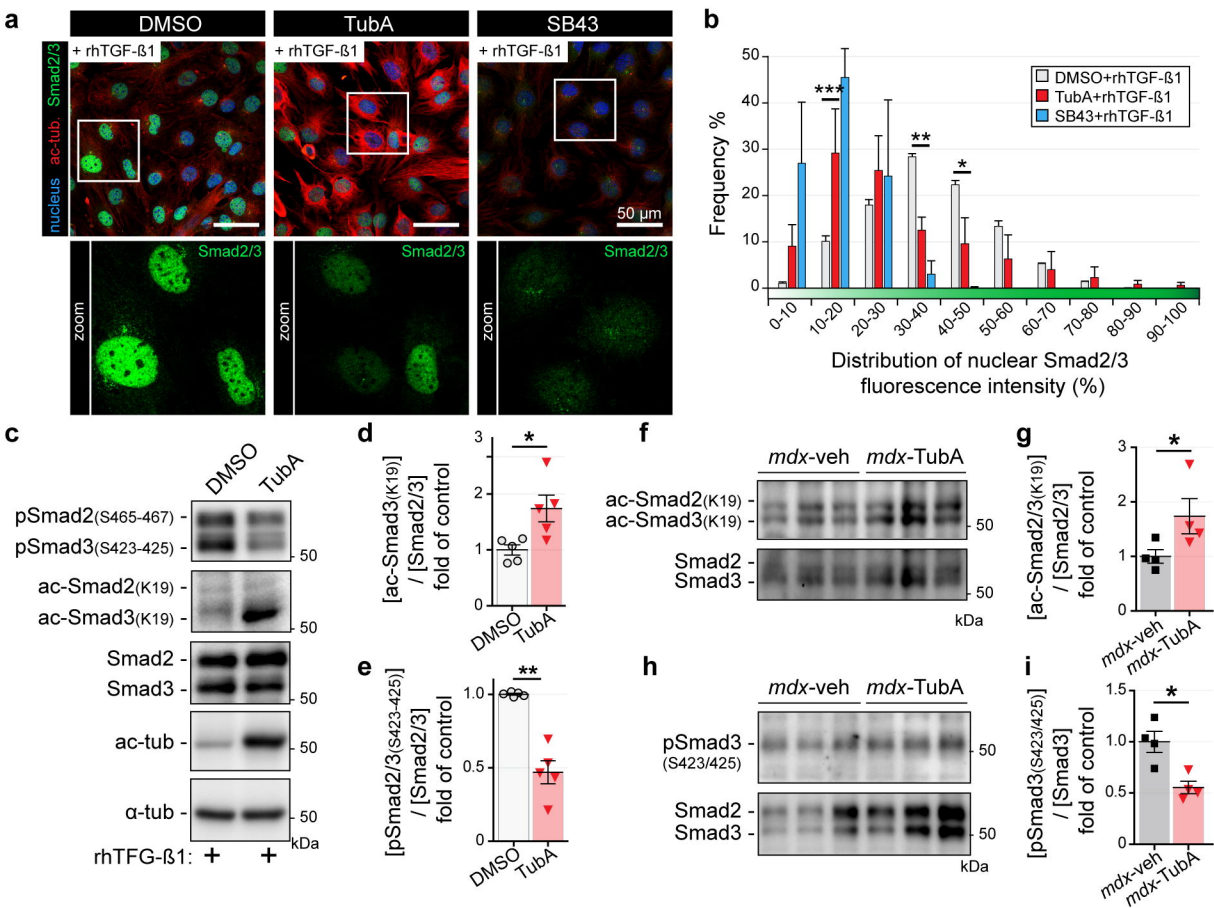

**Fig. 5 | TGF- $\beta$  signaling is regulated by TubA via acetylation of Smad2/3.** **a-e**, 4-d-old C2C12 myoblasts pretreated for 24 h with either HDAC6 inhibitor (TubA, 5  $\mu$ M), or selective inhibitor of TGF- $\beta$ 1 (SB43, 5  $\mu$ M) or with DMSO (CTL, 1  $\mu$ l). Myoblasts were then treated for 30 min with rhTGF- $\beta$ 1 (10 ng/mL). 11-wk-old C57BL/10ScSn-Dmdmdx/J mice treated with TubA (*mdx-TubA*) or with vehicle-DMSO (*mdx-veh*) for 30 consecutive days have been analyzed in TA muscle by Western blot analysis (**f**, **h**) and quantified (**g**, **i**). **a**, Myoblasts were double-stained with antibodies against Smad2/3 (in green) and acetylated tubulin (ac-tub, in red). Nuclei were labeled with DAPI (in blue). **b**, Graphical summary of nuclear distribution of Smad2/3 fluorescence intensity from 3 independent experiments. Quantifications show means  $\pm$  SEM. \*,  $P < 0.05$ ; \*\* $P < 0.01$ ; two-way ANOVA (TubA+rhTGF- $\beta$ 1 versus DMSO+rhTGF- $\beta$ 1). **c**, **f**, **h**, Levels of Smad2/3 phosphorylation (S465-467; S423-425), Smad2/3 acetylation (K19), Smad2/3, acetylated tubulin (ac-tub), and  $\alpha$ -tubulin ( $\alpha$ -tub) were visualized by Western blot analysis. **d**, **e**, **g**, **i**, To evaluate levels of Smad2/3 acetylation (**d**, **g**) and Smad2/3 phosphorylations (**e**, **i**), both in C2C12 cells (**d**, **e**; 5 independent experiments quantified) and in TA muscles (**g**, **i**; 4 mice per group), quantifications have been performed. TCE was used as a loading control for all Western blots. Quantifications show means  $\pm$  SEM. \*,  $P < 0.05$ ; \*\*,  $P < 0.01$ ; Mann-Whitney U test. kDa, relative molecular weight in kiloDalton.



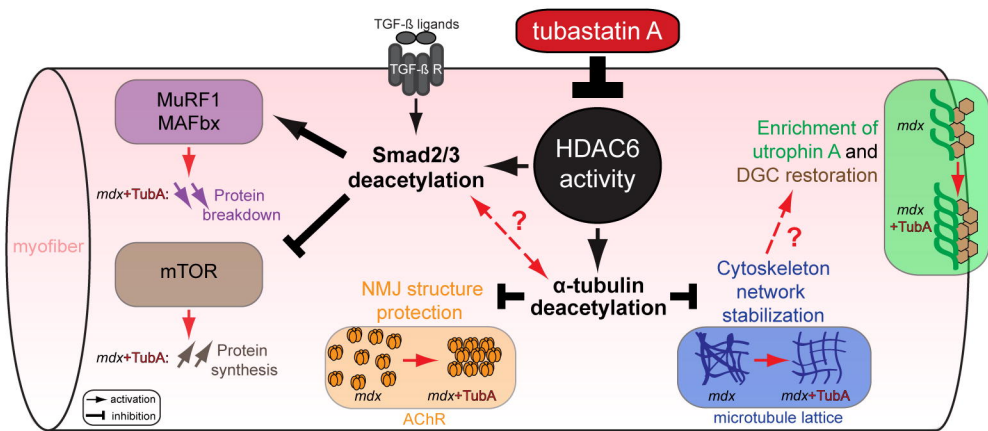

**Fig. 6 | Consequences of HDAC6 activity inhibition regulation through TubA treatment in DMD mice model.** HDAC6 inhibitor such as TubA induces a decrease in HDAC6 activity that leads to an acetylation of  $\alpha$ -tubulin and of Smad2/3. HDAC6 pharmacological inhibition allows an increase of  $\alpha$ -tubulin acetylation to restore DGC and stabilize MT network/NMJ organizations. Additionally, specific inhibition of HDAC6 increase acetylation of Smad2/3 which can interfere with TGF- $\beta$  signaling to both reduce muscle atrophy by reducing the expression of key actors such as MAFbx/MuRF1 and to stimulate protein synthesis via mTOR pathway. Our results identify HDAC6 as a pharmacological target of interest for DMD.
